# Supplementary material for: Human influenza virus infection elicits distinct patterns of monocyte and dendritic cell mobilization in blood and the nasopharynx
Source: eLife. 2023 Feb 8;12:e77345. doi: 10.7554/eLife.77345 (PMC9977282; doi:10.7554/eLife.77345)
Supplement: Figure 1—source data 1. [file elife-77345-fig1-data1.xlsx]

## Sheet: 1D_Blood
Blood cell yield (x10^6 PBMCs per mL blood)	HC	IAV+		Mann Whitney test
	2.6847	1.59375		P value	0.0014
	2.06847	1		Exact or approximate P value?	Exact
	2.14785	0.575		P value summary	**
	1.8125	2		Significantly different (P < 0.05)?	Yes
	1.75	1.77778		One- or two-tailed P value?	Two-tailed
	2.375	1.875		Sum of ranks in column A,B	628 , 968
	1.2574	2.2		Mann-Whitney U	148
	1.5	1.21528
	1.15714	1.85714
	2.125	1.76471
	1.25	0.498188
	1.8125	1.13982
	3.3125	2.72727
	2.02578	1.07527
	1.75	1.57895
	1.6845	1.21528
		0.618421
		1.21212
		0.921053
		1.68776
		1.44462
		1.13032
		1.30814
		0.773196
		1.78571
		1.18797
		1
		2.875
		1.21528
		0.525
		1.0625
		0.4
		1.36364
		0.888889
		1.66667
		2.11111
		1.12782
		0.919118
		0.807823
		3.2
Median	1.8125	1.21528
