# Supplementary material for: Human influenza virus infection elicits distinct patterns of monocyte and dendritic cell mobilization in blood and the nasopharynx
Source: eLife. 2023 Feb 8;12:e77345. doi: 10.7554/eLife.77345 (PMC9977282; doi:10.7554/eLife.77345)
Supplement: Figure 1—source data 2. [file elife-77345-fig1-data2.xlsx]

## Sheet: 1D_NPA
total NPA cells (x10^6 )	HC	IAV+		Mann Whitney test
	0.16	0.272		P value	0.0064
	0.24	0.272		Exact or approximate P value?	Exact
	0.15	1.14		P value summary	**
	0.5	0.15		Significantly different (P < 0.05)?	Yes
	0	0.64		One- or two-tailed P value?	Two-tailed
	0.3	1.2		Sum of ranks in column A,B	221.5 , 1210
	0.57	0.82		Mann-Whitney U	130.5
	0.56	6.2
	0.25	0.4
	0.2	1.1
	0.32	0.609804
	0.25	1.11688
	0.39	0
		4.36364
		0.507937
		0
		3.09524
		3.63636
		7.86667
		4.82623
		1.91429
		0.04
		0.153846
		1.48148
		10.1316
		15.7609
		0.548387
		0.36
		0
		0.67
		0.2
		0.05
		0.38
		0.19
		0.77
		2.2
		2.72727
		2.04545
		1.4
		0.77
Median	0.25	0.77
