# Supplementary material for: Human influenza virus infection elicits distinct patterns of monocyte and dendritic cell mobilization in blood and the nasopharynx
Source: eLife. 2023 Feb 8;12:e77345. doi: 10.7554/eLife.77345 (PMC9977282; doi:10.7554/eLife.77345)
Supplement: Figure 1—source data 3. [file elife-77345-fig1-data3.xlsx]

## Sheet: 1E_Blood
Blood cell viability (%)	HC	IAV+		Mann Whitney test
	76	52		P value	0.1268
	78	72		Exact or approximate P value?	Exact
	95	73		P value summary	ns
	75	71		Significantly different (P < 0.05)?	No
	83	77		One- or two-tailed P value?	Two-tailed
	81	70		Sum of ranks in column A,B	540.5 , 1056
	97	78		Mann-Whitney U	235.5
	89	70
	98	75
	96	92
	79	94
	97	55
	98	93
	80	95
	91	96
	89	95
		77
		84
		76
		79
		89
		94
		86
		97
		96
		95
		86
		95
		81
		83
		71
		90
		93
		95
		54
		95
		68
		98
		78
		85
Median	89	84.5
