# Supplementary material for: Human influenza virus infection elicits distinct patterns of monocyte and dendritic cell mobilization in blood and the nasopharynx
Source: eLife. 2023 Feb 8;12:e77345. doi: 10.7554/eLife.77345 (PMC9977282; doi:10.7554/eLife.77345)
Supplement: Figure 1—source data 4. [file elife-77345-fig1-data4.xlsx]

## Sheet: 1E_NPA
NPA cell viability (%)	HC	IAV+		Mann Whitney test
	59	50		P value	0.6641
	57	43		Exact or approximate P value?	Exact
	76	43		P value summary	ns
	48	24		Significantly different (P < 0.05)?	No
	25	30		One- or two-tailed P value?	Two-tailed
	52	25		Sum of ranks in column A,B	372.5 , 1059
	70	26		Mann-Whitney U	238.5
	40	33
	41	0
	66	55
	36	63
	39	0
	69	63
		75
		61
		70
		100
		91
		38
		92
		62
		21
		60
		47
		15
		14
		25
		63
		65
		61
		51
		77
		51
		62
		67
		25
		70
		75
		38
		10
Median	52	51
