# Supplementary material for: Human influenza virus infection elicits distinct patterns of monocyte and dendritic cell mobilization in blood and the nasopharynx
Source: eLife. 2023 Feb 8;12:e77345. doi: 10.7554/eLife.77345 (PMC9977282; doi:10.7554/eLife.77345)
Supplement: Figure 1—source data 5. [file elife-77345-fig1-data5.xlsx]

## Sheet: 1F_Blood
Blood frequency of lin–HLA-DR+ cells (%)	HC Blood	IAV+ Blood		Mann Whitney test
	10.3786	29.9		P value	<0.0001
	6.08	21.3		Exact or approximate P value?	Exact
	4.66	20.1		P value summary	****
	12.75	16.4		Significantly different (P < 0.05)?	Yes
	10.282	19		One- or two-tailed P value?	Two-tailed
	9.65	21.9		Sum of ranks in column A,B	155.5 , 585.5
	8.83975	12.2		Mann-Whitney U	19.5
	11.04	54.9
	11.624	26.9
	12.9838	4.98
	9.2984	22.95
	12.8	12.8
	10.9	27.13
	8.4	13.2
	10.4	15.7
	6.2	36.1
		34.1
		64.5
		33.4
		16.4
		18.5
		13.5
Median	10.3303	20.7
