# Supplementary material for: Human influenza virus infection elicits distinct patterns of monocyte and dendritic cell mobilization in blood and the nasopharynx
Source: eLife. 2023 Feb 8;12:e77345. doi: 10.7554/eLife.77345 (PMC9977282; doi:10.7554/eLife.77345)
Supplement: Figure 1—source data 6. [file elife-77345-fig1-data6.xlsx]

## Sheet: 1F_NPA
NPA frequency of lin–HLA-DR+ cells (%)	HC NPA	IAV+ NPA		Mann Whitney test
	2.76	37.4		P value	<0.0001
	2.64	28.5		Exact or approximate P value?	Exact
	1.88	47.3		P value summary	****
	1.3	72.6		Significantly different (P < 0.05)?	Yes
	36.7	18.7		One- or two-tailed P value?	Two-tailed
	0.65	11.37		Sum of ranks in column A,B	101 , 494
	2.5	2.77		Mann-Whitney U	23
	2.046	5.73
	2.94	44.7
	3.09	58.3
	7.9	11.9
	2.65	20.7
		2.97
		9.7
		8.66
		13.09
		9.16
		11.46
		9.9
		13.4
		12.1
		12.9
Median	2.645	12.5
