# Supplementary material for: Human influenza virus infection elicits distinct patterns of monocyte and dendritic cell mobilization in blood and the nasopharynx
Source: eLife. 2023 Feb 8;12:e77345. doi: 10.7554/eLife.77345 (PMC9977282; doi:10.7554/eLife.77345)
Supplement: Figure 2—source data 1. [file elife-77345-fig2-data1.xlsx]

## Sheet: Sheet1
Blood frequency of CM/lin–HLA-DR+ cells (%)	HC	IAV+		Mann Whitney test
	44.01	41.6		P value	0.4026
	60.146	27.9		Exact or approximate P value?	Exact
	58.23	61.822		P value summary	ns
	64.38	72.84		Significantly different (P < 0.05)?	No
	70.02	61.06		One- or two-tailed P value?	Two-tailed
	69.86	71.48		Sum of ranks in column A,B	234 , 361
	53.13	14.8		Mann-Whitney U	108
	57.5	62.38
	67.73	69.26
	66.76	66.2
	60.31	51.76
	63.492	53.3
		52.988
		14.636
		49.2881
		53.526
		70.412
		53.158
		72.5901
		58.38
		59.654
		63.7974
Median	61.901	59.017
