# Supplementary material for: Human influenza virus infection elicits distinct patterns of monocyte and dendritic cell mobilization in blood and the nasopharynx
Source: eLife. 2023 Feb 8;12:e77345. doi: 10.7554/eLife.77345 (PMC9977282; doi:10.7554/eLife.77345)
Supplement: Figure 2—source data 2. [file elife-77345-fig2-data2.xlsx]

## Sheet: Sheet1
NPA frequency of CM/lin–HLA-DR+ cells (%)	HC	IAV+		Mann Whitney test
	0	78.66		P value	0.0008
	11.7	80.76		Exact or approximate P value?	Exact
	8.576	16.66		P value summary	***
	24.662	67.54		Significantly different (P < 0.05)?	Yes
	36.7	76.9		One- or two-tailed P value?	Two-tailed
	4.938	80.6		Sum of ranks in column A,B	110 , 355
	10.18	41.48		Mann-Whitney U	32
	31.06	29.008
	48.6	84.96
	5.67	86
	2.67	74.64
	38.4	14.9
		51.46
		55.3
		15.18
		31.418
		26.238
		19.278
Median	10.94	53.38
