# Supplementary material for: Human influenza virus infection elicits distinct patterns of monocyte and dendritic cell mobilization in blood and the nasopharynx
Source: eLife. 2023 Feb 8;12:e77345. doi: 10.7554/eLife.77345 (PMC9977282; doi:10.7554/eLife.77345)
Supplement: Figure 2—source data 3. [file elife-77345-fig2-data3.xlsx]

## Sheet: Sheet1
Blood frequency of IM/lin–HLA-DR+ cells (%)	HC	IAV+		Mann Whitney test
	2.72	28		P value	<0.0001
	11.5	22.7		Exact or approximate P value?	Exact
	12.7	26.5		P value summary	****
	3.63	10.3		Significantly different (P < 0.05)?	Yes
	3.78	19.1		One- or two-tailed P value?	Two-tailed
	10.9	15.1		Sum of ranks in column A,B	90 , 505
	11.1	69.8		Mann-Whitney U	12
	4.33	24.1
	6.99	25.3
	1.56	5.8
	8.81	14.8
	6.99	14.8
		34.1
		60.8
		22.8
		34.1
		16.3
		40.9
		11.7
		38.5
		25.9
		24.4
Median	6.99	24.25
