# Supplementary material for: Human influenza virus infection elicits distinct patterns of monocyte and dendritic cell mobilization in blood and the nasopharynx
Source: eLife. 2023 Feb 8;12:e77345. doi: 10.7554/eLife.77345 (PMC9977282; doi:10.7554/eLife.77345)
Supplement: Figure 2—source data 4. [file elife-77345-fig2-data4.xlsx]

## Sheet: Sheet1
NPA frequency of IM/lin–HLA-DR+ cells (%)	HC	IAV+		Mann Whitney test
	0	0.37		P value	<0.0001
	0	11.7		Exact or approximate P value?	Exact
	0	15.6		P value summary	****
	0	26.3		Significantly different (P < 0.05)?	Yes
	1.67	21.9		One- or two-tailed P value?	Two-tailed
	0	12.1		Sum of ranks in column A,B	89 , 376
	2.7	3.57		Mann-Whitney U	11
	3.7	3.11
	3.98	7
	0	11
	0	12.9
	3.93	5.65
		38.7
		27.3
		13.5
		8.7
		5.26
		33.1
Median	0	11.9
