# Supplementary material for: Human influenza virus infection elicits distinct patterns of monocyte and dendritic cell mobilization in blood and the nasopharynx
Source: eLife. 2023 Feb 8;12:e77345. doi: 10.7554/eLife.77345 (PMC9977282; doi:10.7554/eLife.77345)
Supplement: Figure 2—source data 5. [file elife-77345-fig2-data5.xlsx]

## Sheet: Sheet1
Blood frequency of NCM/lin–HLA-DR+ cells (%)	HC	IAV+		Mann Whitney test
	3.5	4.88		P value	0.054
	12.1	1		Exact or approximate P value?	Exact
	11.3	3.6		P value summary	ns
	7.32	8.29		Significantly different (P < 0.05)?	No
	4.84	0.59		One- or two-tailed P value?	Two-tailed
	5.11	3.5		Sum of ranks in column A,B	237.5 , 323.5
	7.12	5.3		Mann-Whitney U	70.5
	6.45	0.86
	3.46	0.86
	2.62	0.13
	13.3	6.38
		6.62
		5.66
		14.3
		4.28
		1.98
		4.4
		3.64
		4.84
		0.26
		8.21
		2.62
Median	6.45	3.96
