# Supplementary material for: Human influenza virus infection elicits distinct patterns of monocyte and dendritic cell mobilization in blood and the nasopharynx
Source: eLife. 2023 Feb 8;12:e77345. doi: 10.7554/eLife.77345 (PMC9977282; doi:10.7554/eLife.77345)
Supplement: Figure 2—source data 6. [file elife-77345-fig2-data6.xlsx]

## Sheet: Sheet1
NPA frequency of NCM/lin–HLA-DR+ cells (%)	HC	IAV+		Mann Whitney test
	0.027	0.057		P value	0.1901
	0	0.77		Exact or approximate P value?	Exact
		2.22		P value summary	ns
	0.017	0.22		Significantly different (P < 0.05)?	No
	0	0.078		One- or two-tailed P value?	Two-tailed
	0.29	0.17		Sum of ranks in column A,B	135.5 , 299.5
	0.0548	0		Mann-Whitney U	69.5
	0.32	1.47
	0	0.84
	0.98	0.14
	0.87	0.015
	0.21	1.21
		0
		0.61
		0.9
		4.09
		0
		0.51
Median	0.0548	0.365
