# Supplementary material for: Human influenza virus infection elicits distinct patterns of monocyte and dendritic cell mobilization in blood and the nasopharynx
Source: eLife. 2023 Feb 8;12:e77345. doi: 10.7554/eLife.77345 (PMC9977282; doi:10.7554/eLife.77345)
Supplement: Figure 2—source data 7. [file elife-77345-fig2-data7.xlsx]

## Sheet: Sheet1
NPA frequency of DCs/lin–HLA-DR+ cells (%)	cDC2	cDC1	CD123+ PDC	Mo-DC
	0.15	0.016901	0.142	0
	0.2	0.8234	0	0
	0.185	0.0222	0.9	0.612
	0.185	0	0	0.169
	0.358	0.0617	0	0
	0.266	0.26717	0	0.196
	0.106	0.0544	0.33	0.76
	0.37	0.3677	0.052	0.77
	0.214	0	0	0
	0.34	0.0017	0.52	0.45
	0.28	0.13697	0	0.36
	0.18	0	0	0
	0.52	0.003	0.015	0.19
Median	0.214	0.0222	0	0.19
