# Supplementary material for: Human influenza virus infection elicits distinct patterns of monocyte and dendritic cell mobilization in blood and the nasopharynx
Source: eLife. 2023 Feb 8;12:e77345. doi: 10.7554/eLife.77345 (PMC9977282; doi:10.7554/eLife.77345)
Supplement: Figure 2—source data 8. [file elife-77345-fig2-data8.xlsx]

## Sheet: Sheet1
Blood frequency of cDC2/lin–HLA-DR+ cells (%)	HC	IAV+		Mann Whitney test
	4.18	0		P value	<0.0001
	4.08	0.33		Exact or approximate P value?	Exact
	2.48	0.13		P value summary	****
	3.04	1.69		Significantly different (P < 0.05)?	Yes
	1.73	0.52		One- or two-tailed P value?	Two-tailed
	11.1	0.23		Sum of ranks in column A,B	432 , 271
	6.86	1.21		Mann-Whitney U	18
	4.29	0.64
	5.64	0.42
	3.65	1.09
	2.65	3.74
	3.47	5.08
	7.06	0.57
	2.88	0.24
	4.07	1.41
		0.089
		0.53
		0.2
		0.22
		0.038
		0.42
		0.34
Median	4.07	0.42
