# Supplementary material for: Human influenza virus infection elicits distinct patterns of monocyte and dendritic cell mobilization in blood and the nasopharynx
Source: eLife. 2023 Feb 8;12:e77345. doi: 10.7554/eLife.77345 (PMC9977282; doi:10.7554/eLife.77345)
Supplement: Figure 2—source data 9. [file elife-77345-fig2-data9.xlsx]

## Sheet: Sheet1
NPA frequency of cDC2/lin–HLA-DR+ cells (%)	HC	IAV+		Mann Whitney test
	0.016901	0.24		P value	<0.0001
	0.8234	1.01		Exact or approximate P value?	Exact
	0.0222	1.69		P value summary	****
	0	1.3		Significantly different (P < 0.05)?	Yes
	0.0617	0.23		One- or two-tailed P value?	Two-tailed
	0.26717	1.82		Sum of ranks in column A,B	100 , 396
	0.0544	1.98		Mann-Whitney U	9
	0.3677	5.09
	0	1.3
	0.0017	0.85
	0.13697	0.51
	0	13.7
	0.003	2.68
		1.28
		3.14
		3.02
		10.5
		0.32
Median	0.0222	1.495
