# Supplementary material for: Human influenza virus infection elicits distinct patterns of monocyte and dendritic cell mobilization in blood and the nasopharynx
Source: eLife. 2023 Feb 8;12:e77345. doi: 10.7554/eLife.77345 (PMC9977282; doi:10.7554/eLife.77345)
Supplement: Figure 2—source data 10. [file elife-77345-fig2-data10.xlsx]

## Sheet: Sheet1
Blood frequency of cDC1/lin–HLA-DR+ cells (%)	HC	IAV+		Mann Whitney test
	0.57	0.12		P value	<0.0001
	0.56	0.13		Exact or approximate P value?	Exact
	0.18	0.026		P value summary	****
	0.12	0.093		Significantly different (P < 0.05)?	Yes
	0.22	0.093		One- or two-tailed P value?	Two-tailed
	0.77	0.12		Sum of ranks in column A,B	404.5 , 298.5
	0.33	0.14		Mann-Whitney U	45.5
	0.36	0.037
	0.44	0.058
	0.32	0.09
	0.12	0.11
	0.15	0.33
	0.46	0.067
	0.38	0.19
	0.47	0.032
		0.0199
		0.703
		0.019
		0.022
		0.053
		0.875
		0.022
Median	0.36	0.0915
