# Supplementary material for: Human influenza virus infection elicits distinct patterns of monocyte and dendritic cell mobilization in blood and the nasopharynx
Source: eLife. 2023 Feb 8;12:e77345. doi: 10.7554/eLife.77345 (PMC9977282; doi:10.7554/eLife.77345)
Supplement: Figure 2—source data 11. [file elife-77345-fig2-data11.xlsx]

## Sheet: Sheet1
NPA frequency of cDC1/lin–HLA-DR+ cells (%)	HC	IAV+		Mann Whitney test
	0.142	0.35		P value	0.0002
	0	0.29		Exact or approximate P value?	Exact
	0.9	1.28		P value summary	***
	0	1.14		Significantly different (P < 0.05)?	Yes
	0	0.86		One- or two-tailed P value?	Two-tailed
	0	3.57		Sum of ranks in column A,B	120.5 , 375.5
	0.33	1.23		Mann-Whitney U	29.5
	0.052	0.31
	0	0.086
	0.52	0.69
	0	0.38
	0	0
	0.015	2.22
		1.3
		0.68
		1.1
		0.23
		1.45
Median	0	0.775
