# Supplementary material for: Human influenza virus infection elicits distinct patterns of monocyte and dendritic cell mobilization in blood and the nasopharynx
Source: eLife. 2023 Feb 8;12:e77345. doi: 10.7554/eLife.77345 (PMC9977282; doi:10.7554/eLife.77345)
Supplement: Figure 2—source data 12. [file elife-77345-fig2-data12.xlsx]

## Sheet: Sheet1
Blood frequency of PDCs/lin–HLA-DR+ cells (%)	HC	IAV+		Mann Whitney test
	4.56	1.27		P value	<0.0001
	4.15	1.16		Exact or approximate P value?	Exact
	4.31	1.06		P value summary	****
	7.96	2.01		Significantly different (P < 0.05)?	Yes
	8.07	11.5		One- or two-tailed P value?	Two-tailed
	10.3	3.05		Sum of ranks in column A,B	421 , 282
	11.6	3.66		Mann-Whitney U	29
	8.8	5.8
	8.84	1.41
	7.08	1.58
	6.3	6.62
	4.55	4.97
	10.9	4.41
	8.57	0.29
	7.19	2.68
		0.96
		1.82
		0.87
		3.41
		1.05
		1.86
		1.87
Median	7.96	1.865
