# Supplementary material for: Human influenza virus infection elicits distinct patterns of monocyte and dendritic cell mobilization in blood and the nasopharynx
Source: eLife. 2023 Feb 8;12:e77345. doi: 10.7554/eLife.77345 (PMC9977282; doi:10.7554/eLife.77345)
Supplement: Figure 2—source data 13. [file elife-77345-fig2-data13.xlsx]

## Sheet: Sheet1
NPA frequency of PDCs/lin–HLA-DR+ cells (%)	HC	IAV+		Mann Whitney test
	0.15	1.38		P value	0.0062
	0.2	1.64		Exact or approximate P value?	Exact
	0.185	4.44		P value summary	**
	0.185	1.68		Significantly different (P < 0.05)?	Yes
	0.358	0.079		One- or two-tailed P value?	Two-tailed
	0.266	1.12		Sum of ranks in column A,B	141 , 355
	0.106	14.3		Mann-Whitney U	50
	0.37	1.53
	0.214	0.81
	0.34	0.19
	0.28	0.39
	0.18	0
	0.52	0.38
		5.26
		0.45
		10.3
		0
		8.25
Median	0.214	1.25
