# Supplementary material for: Human influenza virus infection elicits distinct patterns of monocyte and dendritic cell mobilization in blood and the nasopharynx
Source: eLife. 2023 Feb 8;12:e77345. doi: 10.7554/eLife.77345 (PMC9977282; doi:10.7554/eLife.77345)
Supplement: Figure 2—source data 14. [file elife-77345-fig2-data14.xlsx]

## Sheet: Sheet1
BLOOD frequency of Mo-DC/lin–HLA-DR+ cells (%)	HC	IAV+		Mann Whitney test
	0.22	0		P value	<0.0001
	0.75	0		Exact or approximate P value?	Exact
	0.59	0.089		P value summary	****
	0.7	0.23		Significantly different (P < 0.05)?	Yes
	0.43	0.32		One- or two-tailed P value?	Two-tailed
	0.72	0.11		Sum of ranks in column A,B	408.5 , 294.5
	0.52	0.15		Mann-Whitney U	41.5
	0.59	0.41
	0.7	0.22
	0.87	0.45
	0.8	0.32
	0.054	0.2
	0.12	0.056
	0.14	0.082
	0.5	0.00596
		0.037
		0.094
		0.071
		0.047
		0.11
		0.023
		0.3513
Median	0.59	0.102
