# Supplementary material for: Human influenza virus infection elicits distinct patterns of monocyte and dendritic cell mobilization in blood and the nasopharynx
Source: eLife. 2023 Feb 8;12:e77345. doi: 10.7554/eLife.77345 (PMC9977282; doi:10.7554/eLife.77345)
Supplement: Figure 2—source data 15. [file elife-77345-fig2-data15.xlsx]

## Sheet: Sheet1
NPA frequency of PDCs/lin–HLA-DR+ cells (%)	HC	IAV+		Mann Whitney test
	0	0.52		P value	0.7103
	0	0.12		Exact or approximate P value?	Exact
	0.612	1.67		P value summary	ns
	0.169	1.38		Significantly different (P < 0.05)?	No
	0	0		One- or two-tailed P value?	Two-tailed
	0.196	0		Sum of ranks in column A,B	198.5 , 297.5
	0.76	2.46		Mann-Whitney U	107.5
	0.77	0.096
	0	0.32
	0.45	0
	0.36	0.18
	0	0
	0.19	0.12
		0
		1.61
		0.091
		0.031
		0.961
Median	0.19	0.12
