# Supplementary material for: Human influenza virus infection elicits distinct patterns of monocyte and dendritic cell mobilization in blood and the nasopharynx
Source: eLife. 2023 Feb 8;12:e77345. doi: 10.7554/eLife.77345 (PMC9977282; doi:10.7554/eLife.77345)
Supplement: Figure 2—source data 16. [file elife-77345-fig2-data16.xlsx]

## Sheet: Sheet1
Blood frequency of IM/lin–HLA-DR+ cells (%)	Age
28	77		Best-fit values
22.7	70		Slope	-0.4013
26.5	38		Y-intercept	51.13
10.3	92		X-intercept	127.4
19.1	73		1/slope	-2.492
15.1	85
69.8	31		Std. Error
24.1	39		Slope	0.1362
25.3	63		Y-intercept	8.778
5.8	55
14.8	71		95% Confidence Intervals
14.8	68		Slope	-0.6853 to -0.1173
34.1	62		Y-intercept	32.81 to 69.44
60.8	20		X-intercept	97.63 to 290.3
22.8	71
34.1	83		Goodness of Fit
16.3	74		R squared	0.3028	r=-0.55
40.9	38		Sy.x	13.25
11.7	34
38.5	45		Is slope significantly non-zero?
25.9	56		F	8.687
24.4	98		DFn, DFd	1, 20
			P value	0.008
			Deviation from zero?	Significant
