# Supplementary material for: Human influenza virus infection elicits distinct patterns of monocyte and dendritic cell mobilization in blood and the nasopharynx
Source: eLife. 2023 Feb 8;12:e77345. doi: 10.7554/eLife.77345 (PMC9977282; doi:10.7554/eLife.77345)
Supplement: Figure 2—source data 17. [file elife-77345-fig2-data17.xlsx]

## Sheet: Sheet1
NPA frequency of IM/lin–HLA-DR+ cells (%)	Age
0.37	77		Best-fit values
11.7	38		Slope	0.2334
15.6	92		Y-intercept	-0.1096
26.3	73		X-intercept	0.4697
21.9	85		1/slope	4.285
12.1	31
3.57	63		Std. Error
3.11	55		Slope	0.1125
7	71		Y-intercept	7.341
11	68
12.9	62		95% Confidence Intervals
5.65	20		Slope	-0.005053 to 0.4718
38.7	71		Y-intercept	-15.67 to 15.45
27.3	74		X-intercept	-infinity to 35.13
13.5	34
8.7	45		Goodness of Fit
5.26	56		R squared	0.212	r=0.46
33.1	98		Sy.x	9.979
			Is slope significantly non-zero?
			F	4.306
			DFn, DFd	1, 16
			P value	0.0454
			Deviation from zero?	Significant
			Equation	Y = 0.2334*X - 0.1096
			Data
			Number of X values	18
			Maximum number of Y replicates	1
			Total number of values	18
			Number of missing values	0
