# Supplementary material for: Human influenza virus infection elicits distinct patterns of monocyte and dendritic cell mobilization in blood and the nasopharynx
Source: eLife. 2023 Feb 8;12:e77345. doi: 10.7554/eLife.77345 (PMC9977282; doi:10.7554/eLife.77345)
Supplement: Figure 2—source data 18. [file elife-77345-fig2-data18.xlsx]

## Sheet: Sheet1
NPA frequency of CD1C+ MDCs/lin–HLA-DR+ cells (%)	Age
0.24	77		Best-fit values
1.01	38		Slope	-0.09423
1.69	92		Y-intercept	8.641
1.3	73		X-intercept	91.7
0.23	85		1/slope	-10.61
1.82	31
1.98	63		Std. Error
5.09	55		Slope	0.03506
1.3	71		Y-intercept	2.289
0.85	68
0.51	62		95% Confidence Intervals
13.7	20		Slope	-0.1686 to -0.01990
2.68	71		Y-intercept	3.789 to 13.49
1.28	74		X-intercept	73.00 to 208.8
3.14	34
3.02	45		Goodness of Fit
10.5	56		R squared	0.311	r=-0.558
0.32	98		Sy.x	3.111
			Is slope significantly non-zero?
			F	7.223
			DFn, DFd	1, 16
			P value	0.0162
			Deviation from zero?	Significant
