# Supplementary material for: Human influenza virus infection elicits distinct patterns of monocyte and dendritic cell mobilization in blood and the nasopharynx
Source: eLife. 2023 Feb 8;12:e77345. doi: 10.7554/eLife.77345 (PMC9977282; doi:10.7554/eLife.77345)
Supplement: Figure 2—source data 19. [file elife-77345-fig2-data19.xlsx]

## Sheet: Sheet1
CM
Blood frequency of cells/lin–HLA-DR+ cells (%)		NPA frequency of cells/lin–HLA-DR+ cells (%)
Acute	Convalescent	Acute	Convalescent
49.294	64.9	51.58	20
69.48	73.1	16.79	9.36
73.07	61.7	31.509	0
61.38	79.4	80.88	12
41.6	66.8	74.82	0.75
14.718	28.7	26.269	14.3
53.044	16.9
66.65	67.1
Wilcoxon matched-pairs signed rank test		Wilcoxon matched-pairs signed rank test
P value	0.3828	P value	0.0312
Exact or approximate P value?	Exact	Exact or approximate P value?	Exact
P value summary	ns	P value summary	*
Significantly different (P < 0.05)?	No	Significantly different (P < 0.05)?	Yes
One- or two-tailed P value?	Two-tailed	One- or two-tailed P value?	Two-tailed
Sum of positive, negative ranks	25.00 , -11.00	Sum of positive, negative ranks	0.000 , -21.00
Sum of signed ranks (W)	14	Sum of signed ranks (W)	-21
Number of pairs	8	Number of pairs	6
Number of ties (ignored)	0	Number of ties (ignored)	0
