# Supplementary material for: Human influenza virus infection elicits distinct patterns of monocyte and dendritic cell mobilization in blood and the nasopharynx
Source: eLife. 2023 Feb 8;12:e77345. doi: 10.7554/eLife.77345 (PMC9977282; doi:10.7554/eLife.77345)
Supplement: Figure 2—source data 20. [file elife-77345-fig2-data20.xlsx]

## Sheet: Sheet1
IM
Blood frequency of cells/lin–HLA-DR+ cells (%)		NPA frequency of cells/lin–HLA-DR+ cells (%)
Acute	Convalescent	Acute	Convalescent
21.4	7.38	27.3	15.6
16.1	9.39	13.5	0.58
11.7	6.96	8.7	0
34.5	4.47	6	1.09
23.8	10.9	13.2	0
27.6	3.4	3.83	0
31.5	4.29
5.18	4.94
Wilcoxon matched-pairs signed rank test		Wilcoxon matched-pairs signed rank test
P value	0.0078	P value	0.0312
Exact or approximate P value?	Exact	Exact or approximate P value?	Exact
P value summary	**	P value summary	*
Significantly different (P < 0.05)?	Yes	Significantly different (P < 0.05)?	Yes
One- or two-tailed P value?	Two-tailed	One- or two-tailed P value?	Two-tailed
Sum of positive, negative ranks	0.000 , -36.00	Sum of positive, negative ranks	0.000 , -21.00
Sum of signed ranks (W)	-36	Sum of signed ranks (W)	-21
Number of pairs	8	Number of pairs	6
Number of ties (ignored)	0	Number of ties (ignored)	0
