# Supplementary material for: Human influenza virus infection elicits distinct patterns of monocyte and dendritic cell mobilization in blood and the nasopharynx
Source: eLife. 2023 Feb 8;12:e77345. doi: 10.7554/eLife.77345 (PMC9977282; doi:10.7554/eLife.77345)
Supplement: Figure 2—source data 21. [file elife-77345-fig2-data21.xlsx]

## Sheet: Sheet1
cDC2 MDCs
Blood frequency of cells/lin–HLA-DR+ cells (%)		NPA frequency of cells/lin–HLA-DR+ cells (%)
Acute	Convalescent	Acute	Convalescent
1.4	3.13	1.28	0
0.52	1.58	3.14	1.46
0.22	1.5	3.02	0
0.034	1.22	0.11	0
0.1	1.02	0.78	3.02
0.16	13.9	2.12	0
0.076	8.85
0.85	0.63
Wilcoxon matched-pairs signed rank test		Wilcoxon matched-pairs signed rank test
P value	0.0156	P value	0.3125
Exact or approximate P value?	Exact	Exact or approximate P value?	Exact
P value summary	*	P value summary	ns
Significantly different (P < 0.05)?	Yes	Significantly different (P < 0.05)?	No
One- or two-tailed P value?	Two-tailed	One- or two-tailed P value?	Two-tailed
Sum of positive, negative ranks	35.00 , -1.000	Sum of positive, negative ranks	5.000 , -16.00
Sum of signed ranks (W)	34	Sum of signed ranks (W)	-11
Number of pairs	8	Number of pairs	6
Number of ties (ignored)	0	Number of ties (ignored)	0
