# Supplementary material for: Human influenza virus infection elicits distinct patterns of monocyte and dendritic cell mobilization in blood and the nasopharynx
Source: eLife. 2023 Feb 8;12:e77345. doi: 10.7554/eLife.77345 (PMC9977282; doi:10.7554/eLife.77345)
Supplement: Figure 3—source data 1. [file elife-77345-fig3-data1.xlsx]

## Sheet: Sheet1
	Blood							NPA
	CM		IM		NCM			CM		IM		NCM
HLA-DR(MFI)	HC	IAV+	HC	IAV+	HC	IAV+		HC	IAV+	HC	IAV+	HC	IAV+
	1022	1991	4024	8318	1044	4108		2888	7269	13512	17862	2040	6645
	1661	1804	5787	2132	1998	1674		7596	2177	25824	6987	1892	4416
	1061	1355	2702	4731	1072	2156		13204	8355	1803	19392	3619	13575
	974	2588	3004	5762	1206	3214		2857	18012	2327	15348	1747	10920
	782	1201	1961	6777	1237	2452		4319	14021	1780	24334	4257	14021
	1218	5604	3511	9534	1093	6041		2696	5951		20042	1415	8299
	1549	2227	5837	5082	1549	6173		5695	19874		38167		14316
	1059	3723	2946	8392	1268	3214			10821		29097		19075
	1448	1392	5750	9751	1251	4566			5451		20617		14516
	1633	1348	7904	3934	2037	3083			7782		24801		15746
	1230	3597	4211	11693	1110	5462			10202		59758		25458
	974	2629	5652	8281	1913	6120			2279		21060		14891
	2857	8467	1803	18415	1747	8171			9577		21010		11666
	4319	2739	2327	23763	4257	12438			31189		87255		40345
	2696	6377	1780	19948	1415	12964					29027		15384
	5695	3120		18073		7992					10271		14184
		9074		18158		10435					46758		28072
		5050		13053		10821
		4425		11854		5439
		5616		11403		2644
		5750		27150		16344
Median	1339	3120	3511	9751	1268	5462		4319	8966	2327	21060	1966	14316
	Mann Whitney test		Mann Whitney test		Mann Whitney test			Mann Whitney test		Mann Whitney test		Mann Whitney test
	P value	0.0014	P value	<0.0001	P value	<0.0001		P value	0.0938	P value	0.0009	P value	<0.0001
	Exact or approximate P value?	Exact	Exact or approximate P value?	Exact	Exact or approximate P value?	Exact		Exact or approximate P value?	Exact	Exact or approximate P value?	Exact	Exact or approximate P value?	Exact
	P value summary	**	P value summary	****	P value summary	****		P value summary	ns	P value summary	**	P value summary	****
	Significantly different (P < 0.05)?	Yes	Significantly different (P < 0.05)?	Yes	Significantly different (P < 0.05)?	Yes		Significantly different (P < 0.05)?	No	Significantly different (P < 0.05)?	Yes	Significantly different (P < 0.05)?	Yes
	One- or two-tailed P value?	Two-tailed	One- or two-tailed P value?	Two-tailed	One- or two-tailed P value?	Two-tailed		One- or two-tailed P value?	Two-tailed	One- or two-tailed P value?	Two-tailed	One- or two-tailed P value?	Two-tailed
	Sum of ranks in column A,B	203 , 500	Sum of ranks in column C,D	153 , 513	Sum of ranks in column E,F	132 , 534		Sum of ranks in column G,H	54 , 177	Sum of ranks in column I,J	28 , 225	Sum of ranks in column K,L	21 , 255
	Mann-Whitney U	67	Mann-Whitney U	33	Mann-Whitney U	12		Mann-Whitney U	26	Mann-Whitney U	13	Mann-Whitney U	0
