# Supplementary material for: Human influenza virus infection elicits distinct patterns of monocyte and dendritic cell mobilization in blood and the nasopharynx
Source: eLife. 2023 Feb 8;12:e77345. doi: 10.7554/eLife.77345 (PMC9977282; doi:10.7554/eLife.77345)
Supplement: Figure 3—source data 2. [file elife-77345-fig3-data2.xlsx]

## Sheet: Sheet1
	Blood							NPA
	CM		IM		NCM			CM		IM		NCM
CD86(MFI)	HC	IAV+	HC	IAV+	HC	IAV+		HC	IAV+	HC	IAV+	HC	IAV+
	2198	1106	3240	1451	1658	1170		2119	6647	2601	3259	906	18
	2400	1784	3325	2882	1661	44.9		2428	2665	2323	3325	261	628
	1761	2206	2573	2490	1693	1506		796	1699	2447	1899	341	534
	1576	1127	2111	1538	1249	1350		2466	2364	1141	3034	448	2723
	1018	546	1751	1758	1696	1342		2777	2826	3723	3641	505	2083
	1702	2270	2712	3022	2048	2173		2697	3583		7731	567	416
	1544	1946	2364	2744	1683	1877		3299	1292		2355		156
	1870	1006	2766	1335	1693	758			2490		3214		844
	1842	948	2573	1774	1552	1028			3046		3490		765
	986	1702	1696	2323	1661	1345			4711		6460		1763
	937	2140	1405	2702	923	1358			3156		5369		1579
	1440	2871	2060	4237	1386	3800			2227		3575		682
	2466	3369	2447	1683	448	1680			3372		4125		135
	2777	3214	1141	5125	505	3189			1246		1636		1983
	2697	3934	3723	4841	567	2509			1709		2048
	3299	3723		4237		2275			1437		5769
		3214		3221		1521			2452		2865
		2262		2707		1683
		3352		4389		1230
		3352		3145		1034
		2843		4237		2707
Median	1801.5	2262	2447	2744	1658	1506		2466	2490	2447	3325	476.5	723.5
	Mann Whitney test		Mann Whitney test		Mann Whitney test			Mann Whitney test		Mann Whitney test		Mann Whitney test
	P value	0.1404	P value	0.1991	P value	0.5735		P value	0.7098	P value	0.1404	P value	0.274
	Exact or approximate P value?	Exact	Exact or approximate P value?	Exact	Exact or approximate P value?	Exact		Exact or approximate P value?	Exact	Exact or approximate P value?	Exact	Exact or approximate P value?	Exact
	P value summary	ns	P value summary	ns	P value summary	ns		P value summary	ns	P value summary	ns	P value summary	ns
	Significantly different (P < 0.05)?	No	Significantly different (P < 0.05)?	No	Significantly different (P < 0.05)?	No		Significantly different (P < 0.05)?	No	Significantly different (P < 0.05)?	No	Significantly different (P < 0.05)?	No
	One- or two-tailed P value?	Two-tailed	One- or two-tailed P value?	Two-tailed	One- or two-tailed P value?	Two-tailed		One- or two-tailed P value?	Two-tailed	One- or two-tailed P value?	Two-tailed	One- or two-tailed P value?	Two-tailed
	Sum of ranks in column A,B	255.5 , 447.5	Sum of ranks in column C,D	237 , 429	Sum of ranks in column E,F	259.5 , 406.5		Sum of ranks in column G,H	81 , 219	Sum of ranks in column I,J	38 , 215	Sum of ranks in column K,L	49 , 161
	Mann-Whitney U	119.5	Mann-Whitney U	117	Mann-Whitney U	139.5		Mann-Whitney U	53	Mann-Whitney U	23	Mann-Whitney U	28
