# Supplementary material for: Human influenza virus infection elicits distinct patterns of monocyte and dendritic cell mobilization in blood and the nasopharynx
Source: eLife. 2023 Feb 8;12:e77345. doi: 10.7554/eLife.77345 (PMC9977282; doi:10.7554/eLife.77345)
Supplement: Figure 3—source data 3. [file elife-77345-fig3-data3.xlsx]

## Sheet: Sheet1
	Blood							NPA
	cDC2		cDC1		PDCs			cDC2		cDC1		PDCs
HLA-DR(MFI)	HC	IAV+	HC	IAV+	HC	IAV+		HC	IAV+	HC	IAV+	HC	IAV+
	1884	1030	1715	2573	945	1211		5580	41631	3671	16154	5082	2750
	2619	4862	1325	1478	2934	1368		3926	13388	2882	10341	8913	2500
	3189	7817	2064	4299	1561	1283		6460	37079	3476	28139	1130	8600
	1731	5900	5082	3195	2072	2185		6676	27673	2563	17572	1693	4903
	1110	9406	4150	2480	2305	2048		6545	26637	782	12669	1761	3028
	751	4741	6067	2782	2076	1218		3448	27150	964	1748	4254	4585
	1234	7496	6363	3619	2888	1863		3671	24860	626	14283	8913	7205
		6377		2010		1034		2310	23989		23932	3151	5246
		4701		2099		888		2801	17006		16230	7748	4721
		8448		1939		982		2788	20137		10318	1223	4643
		5652		8208		2686		1177	13419		18808	2319	7886
		16230		3649		1261			15135		17102		4202
		7173		4150		1699			28410		13296		3182
		23932		1849		2283			11455		10341		3034
		8794		8117		2414			4633		11429		3967
		19031		4272		1839			22502
		7301		4781		2236
		9795		5291		1552
		5347		15563		1498
		6460				1725
						2193
Median	1731	7237	4150	3619	2076	1699		3671	23245.5	2563	14283	3151	4585
	Mann Whitney test		Mann Whitney test		Mann Whitney test			Mann Whitney test		Mann Whitney test		Mann Whitney test
	P value	<0.0001	P value	0.8748	P value	0.14		P value	<0.0001	P value	0.0001	P value	0.3769
	Exact or approximate P value?	Exact	Exact or approximate P value?	Exact	Exact or approximate P value?	Exact		Exact or approximate P value?	Exact	Exact or approximate P value?	Exact	Exact or approximate P value?	Exact
	P value summary	****	P value summary	ns	P value summary	ns		P value summary	****	P value summary	***	P value summary	ns
	Significantly different (P < 0.05)?	Yes	Significantly different (P < 0.05)?	No	Significantly different (P < 0.05)?	No		Significantly different (P < 0.05)?	Yes	Significantly different (P < 0.05)?	Yes	Significantly different (P < 0.05)?	No
	One- or two-tailed P value?	Two-tailed	One- or two-tailed P value?	Two-tailed	One- or two-tailed P value?	Two-tailed		One- or two-tailed P value?	Two-tailed	One- or two-tailed P value?	Two-tailed	One- or two-tailed P value?	Two-tailed
	Sum of ranks in column A,B	34 , 344	Sum of ranks in column C,D	91.50 , 259.5	Sum of ranks in column E,F	130 , 276		Sum of ranks in column G,H	70 , 308	Sum of ranks in column I,J	32 , 221	Sum of ranks in column K,L	131 , 220
	Mann-Whitney U	6	Mann-Whitney U	63.5	Mann-Whitney U	45		Mann-Whitney U	4	Mann-Whitney U	4	Mann-Whitney U	65
