# Supplementary material for: Human influenza virus infection elicits distinct patterns of monocyte and dendritic cell mobilization in blood and the nasopharynx
Source: eLife. 2023 Feb 8;12:e77345. doi: 10.7554/eLife.77345 (PMC9977282; doi:10.7554/eLife.77345)
Supplement: Figure 3—source data 4. [file elife-77345-fig3-data4.xlsx]

## Sheet: Sheet1
Mann Whitney test		Mann Whitney test		Mann Whitney test
P value	0.0035	P value	0.0196	P value	0.7833
Exact or approximate P value?	Exact	Exact or approximate P value?	Exact	Exact or approximate P value?	Exact
P value summary	**	P value summary	*	P value summary	ns
Significantly different (P < 0.05)?	Yes	Significantly different (P < 0.05)?	Yes	Significantly different (P < 0.05)?	No
One- or two-tailed P value?	Two-tailed	One- or two-tailed P value?	Two-tailed	One- or two-tailed P value?	Two-tailed
Sum of ranks in column G,H	42 , 234	Sum of ranks in column I,J	17 , 173	Sum of ranks in column K,L	76 , 177
Mann-Whitney U	14	Mann-Whitney U	7	Mann-Whitney U	48
