# Supplementary material for: Human influenza virus infection elicits distinct patterns of monocyte and dendritic cell mobilization in blood and the nasopharynx
Source: eLife. 2023 Feb 8;12:e77345. doi: 10.7554/eLife.77345 (PMC9977282; doi:10.7554/eLife.77345)
Supplement: Figure 3—source data 5. [file elife-77345-fig3-data5.xlsx]

## Sheet: Sheet1
	PDC
	Blood		NPA
CD83(MFI)	HC	IAV+	HC	IAV+
	155	178	309	6369
	152	149	208	5887
	148	248	226	7724
	130	224	318	6316
		157		5417
		127
		257
		116
		130
Median	150	157	267.5	6316
	Mann Whitney test		Mann Whitney test
	P value	0.5273	P value	0.0159
	Exact or approximate P value?	Exact	Exact or approximate P value?	Exact
	P value summary	ns	P value summary	*
	Significantly different (P < 0.05)?	No	Significantly different (P < 0.05)?	Yes
	One- or two-tailed P value?	Two-tailed	One- or two-tailed P value?	Two-tailed
	Sum of ranks in column A,B	23.50 , 67.50	Sum of ranks in column C,D	10 , 35
	Mann-Whitney U	13.5	Mann-Whitney U	0
