# Supplementary material for: Human influenza virus infection elicits distinct patterns of monocyte and dendritic cell mobilization in blood and the nasopharynx
Source: eLife. 2023 Feb 8;12:e77345. doi: 10.7554/eLife.77345 (PMC9977282; doi:10.7554/eLife.77345)
Supplement: Figure 3—source data 6. [file elife-77345-fig3-data6.xlsx]

## Sheet: Sheet1
Ct value	NPA CM CD86 (MFI)		Best-fit values
24.9	2665		Slope	-147.9
35	1699		Y-intercept	6852
20.6	2364		X-intercept	46.31
27.1	2826		1/slope	-0.006759
28.9	3583
34	1292		Std. Error
29.8	2490		Slope	39.46
21.4	3046		Y-intercept	1118
20.6	4711
21.1	3156		95% Confidence Intervals
35.2	2227		Slope	-232.1 to -63.83
38.2	1246		Y-intercept	4469 to 9236
33.6	1437		X-intercept	38.98 to 71.47
18.4	6647
23.9	3372		Goodness of Fit
23.7	1709		R squared	0.4837	r=-0.696
33.8	2452		Sy.x	1003
			Is slope significantly non-zero?
			F	14.05
			DFn, DFd	1, 15
			P value	0.0019
			Deviation from zero?	Significant
