# Supplementary material for: Human influenza virus infection elicits distinct patterns of monocyte and dendritic cell mobilization in blood and the nasopharynx
Source: eLife. 2023 Feb 8;12:e77345. doi: 10.7554/eLife.77345 (PMC9977282; doi:10.7554/eLife.77345)
Supplement: Figure 3—source data 7. [file elife-77345-fig3-data7.xlsx]

## Sheet: Sheet1
NPA cDC2 CD86 (MFI)	NPA CM CD86 (MFI)		Best-fit values
2177	2665		Slope	0.7189
3693	2490		Y-intercept	1227
3950	6647		X-intercept	-1707
3427	4711		1/slope	1.391
710	1699
1104	1437		Std. Error
2702	2826		Slope	0.1773
4811	3372		Y-intercept	438.2
1972	2227
1555	2364		95% Confidence Intervals
14.1	1292		Slope	0.3386 to 1.099
88.7	1246		Y-intercept	287.5 to 2167
1263	2452		X-intercept	-6066 to -275.9
2934	3046
1135	1709		Goodness of Fit
1432	3156		R squared	0.5401	r=0.735
			Sy.x	968.2
			Is slope significantly non-zero?
			F	16.44
			DFn, DFd	1, 14
			P value	0.0012
			Deviation from zero?	Significant
