# Supplementary material for: Human influenza virus infection elicits distinct patterns of monocyte and dendritic cell mobilization in blood and the nasopharynx
Source: eLife. 2023 Feb 8;12:e77345. doi: 10.7554/eLife.77345 (PMC9977282; doi:10.7554/eLife.77345)
Supplement: Figure 3—source data 8. [file elife-77345-fig3-data8.xlsx]

## Sheet: Sheet1
NPA cDC1 CD86 (MFI)	NPA CM CD86 (MFI)		Best-fit values
2044	2665		Slope	0.9335
1585	2490		Y-intercept	1339
3163	6647		X-intercept	-1435
4041	4711		1/slope	1.071
136	1699
88.7	1437		Std. Error
1687	2826		Slope	0.1723
2068	3372		Y-intercept	338.5
786	2227
582	2364		95% Confidence Intervals
265	1292		Slope	0.5613 to 1.306
998	2452		Y-intercept	607.7 to 2070
2457	3046		X-intercept	-3517 to -488.1
622	1709
3052	3156		Goodness of Fit
			R squared	0.6931	r=0.832
			Sy.x	787.2
			Is slope significantly non-zero?
			F	29.36
			DFn, DFd	1, 13
			P value	0.0001
			Deviation from zero?	Significant
