# Supplementary material for: Human influenza virus infection elicits distinct patterns of monocyte and dendritic cell mobilization in blood and the nasopharynx
Source: eLife. 2023 Feb 8;12:e77345. doi: 10.7554/eLife.77345 (PMC9977282; doi:10.7554/eLife.77345)
Supplement: Figure 4—source data 1. [file elife-77345-fig4-data1.xlsx]

## Sheet: Sheet1
NPA TNF	HC	IAV+		Mann Whitney test
	18.8254	1241.2		P value	0.0482
	12.1555	1198.94		Exact or approximate P value?	Exact
	17.1527	54.3832		P value summary	*
	12.4222	13.1255		Significantly different (P < 0.05)?	Yes
		24.6875
		30.2504
		56.4652
		1256.4
		55.1333
		6.81515
		29.1021
		5.13917
		40.4865
		8.49138
		65.9943
		18.3067
		17.664
		42.663
Median	14.7874	35.3685
