# Supplementary material for: Human influenza virus infection elicits distinct patterns of monocyte and dendritic cell mobilization in blood and the nasopharynx
Source: eLife. 2023 Feb 8;12:e77345. doi: 10.7554/eLife.77345 (PMC9977282; doi:10.7554/eLife.77345)
Supplement: Figure 4—source data 2. [file elife-77345-fig4-data2.xlsx]

## Sheet: Sheet1
NPA IL-6	HC	IAV+		Mann Whitney test
	1.31995	640.499		P value	<0.0001
	1.18879	2.67113		Exact or approximate P value?	Exact
	1.9593	166.274		P value summary	****
	3.32636	1.8623		Significantly different (P < 0.05)?	Yes
	0.2	11.1568
	1.3	110.435
	2.38	124.199
	1.39	87.2892
		23.8373
		35.0934
		16.4403
		24.6288
		300.283
		608.72
		4.38
		591.31
		79.31
Median	1.35497	79.31
