# Supplementary material for: Human influenza virus infection elicits distinct patterns of monocyte and dendritic cell mobilization in blood and the nasopharynx
Source: eLife. 2023 Feb 8;12:e77345. doi: 10.7554/eLife.77345 (PMC9977282; doi:10.7554/eLife.77345)
Supplement: Figure 4—source data 3. [file elife-77345-fig4-data3.xlsx]

## Sheet: Sheet1
NPA IFN	HC	IAV+		Mann Whitney test
	2.7142	33.1038		P value	0.035
	0	31.3682		Exact or approximate P value?	Exact
	4.54847	90.7042		P value summary	*
	2.82959	4.19091		Significantly different (P < 0.05)?	Yes
	2.66701	2.38201
	0	3.6593
	2.4649	75.5147
	0	78.6917
	2.60969	0.506981
	4.17585	3.28124
	0	28.6091
	0	8.92652
		0
		8.07426
		0
		14.6118
		47.7243
Median	2.5373	8.92652
