# Supplementary material for: Human influenza virus infection elicits distinct patterns of monocyte and dendritic cell mobilization in blood and the nasopharynx
Source: eLife. 2023 Feb 8;12:e77345. doi: 10.7554/eLife.77345 (PMC9977282; doi:10.7554/eLife.77345)
Supplement: Figure 4—source data 4. [file elife-77345-fig4-data4.xlsx]

## Sheet: Sheet1
Plasma TNF	HC	IAV+		Mann Whitney test
	24.5128	31.94		P value	0.0313
	12.1472	17.14		Exact or approximate P value?	Exact
	5.9826	13.48		P value summary	*
	7.23349	8.46		Significantly different (P < 0.05)?	Yes
		20.22
		20.22
		20.22
		0
		0
		22.94
		15.4
		17.14
		130.518
		49.1791
		1901.51
		430.587
		35.3506
		82.6958
		67.5127
		131.265
		30.3963
		105.468
		20.8933
		16.6981
		16.2747
		85.1334
		171.263
		26.7188
		239.612
		134.104
		458.781
Median	9.69032	30.3963
