# Supplementary material for: Human influenza virus infection elicits distinct patterns of monocyte and dendritic cell mobilization in blood and the nasopharynx
Source: eLife. 2023 Feb 8;12:e77345. doi: 10.7554/eLife.77345 (PMC9977282; doi:10.7554/eLife.77345)
Supplement: Figure 4—source data 5. [file elife-77345-fig4-data5.xlsx]

## Sheet: Sheet1
Plasma IL6	HC	IAV+		Mann Whitney test
	3.33547	88.02		P value	<0.0001
	2.96852	24.62		Exact or approximate P value?	Exact
	10.7726	31.74		P value summary	****
	16.213	14.84		Significantly different (P < 0.05)?	Yes
	5.3874	32.34
	1.892	17.94
	0.86	42.36
	3.892	26
		15.5
		21.2
		36.22
		22.2
		36.0441
		26.5049
		592.97
		2.5237
		408.949
		8.15708
		853.083
		43.0667
		20.6689
		2.71684
		255.147
		112.998
		91.315
		271.451
		652.731
		63.9378
		307.761
		70.283
		88.652
		106.893
Median	3.61373	39.29
