# Supplementary material for: Human influenza virus infection elicits distinct patterns of monocyte and dendritic cell mobilization in blood and the nasopharynx
Source: eLife. 2023 Feb 8;12:e77345. doi: 10.7554/eLife.77345 (PMC9977282; doi:10.7554/eLife.77345)
Supplement: Figure 4—source data 6. [file elife-77345-fig4-data6.xlsx]

## Sheet: Sheet1
Plasma IFN	HC	IAV+		Mann Whitney test
	0	40.6503		P value	0.0398
	0	8.69486		Exact or approximate P value?	Exact
	1.73708	46.5914		P value summary	*
	0	37.4717		Significantly different (P < 0.05)?	Yes
	5.44965	0
	0	42.631
	0	0
	0	0
	8.98078	0
	0	0
	13.5688	28.6241
	0	0
		184.753
		11.7623
		0
		138.183
		0
		392.227
		125.377
Median	0	11.7623
