# Supplementary material for: Human influenza virus infection elicits distinct patterns of monocyte and dendritic cell mobilization in blood and the nasopharynx
Source: eLife. 2023 Feb 8;12:e77345. doi: 10.7554/eLife.77345 (PMC9977282; doi:10.7554/eLife.77345)
Supplement: Figure 4—source data 7. [file elife-77345-fig4-data7.xlsx]

## Sheet: Sheet1
Log10(plasma TNF)	%CM in blood
2.11567	41.6		Best-fit values
1.69178	61.77		Slope	16.08
3.2791	61.611		Y-intercept	23.36
2.63406	71.38		X-intercept	-1.452
1.5484	14.744		1/slope	0.06217
1.91748	63.05
1.82939	69.29		Std. Error
2.11815	66.88		Slope	6.193
1.48282	51.95		Y-intercept	12.54
2.02312	53.38
1.32001	52.9		95% Confidence Intervals
1.22267	14.99		Slope	3.019 to 29.15
1.21151	49.218		Y-intercept	-3.103 to 49.83
1.9301	53.594		X-intercept	-16.24 to 0.1082
2.23366	70.563
1.42682	53.206		Goodness of Fit
2.37951	73.229		R squared	0.2841	r=0.533
2.12744	58.553		Sy.x	14.26
2.66161	59.59
			Is slope significantly non-zero?
			F	6.746
			DFn, DFd	1, 17
			P value	0.0188
			Deviation from zero?	Significant
