# Supplementary material for: Human influenza virus infection elicits distinct patterns of monocyte and dendritic cell mobilization in blood and the nasopharynx
Source: eLife. 2023 Feb 8;12:e77345. doi: 10.7554/eLife.77345 (PMC9977282; doi:10.7554/eLife.77345)
Supplement: Figure 4—source data 8. [file elife-77345-fig4-data8.xlsx]

## Sheet: Sheet1
Log10(NPA TNF)	%CM in NPA
3.09384	68.92		Best-fit values
3.0788	76.9		Slope	24.26
1.73546	80.6		Y-intercept	6.862
1.39248	43.94		X-intercept	-0.2828
1.48073	29.104		1/slope	0.04122
1.75178	85.28
3.09913	86		Std. Error
1.74141	74.82		Slope	7.845
0.833475	14.9		Y-intercept	15.22
1.46392	51.58
1.60731	55.3		95% Confidence Intervals
1.81951	18.33		Slope	7.310 to 41.21
1.26261	31.509		Y-intercept	-26.01 to 39.74
1.24709	26.269		X-intercept	-5.225 to 0.6568
1.63005	20.239
			Goodness of Fit
			R squared	0.4238	r=0.651
			Sy.x	20.73
			Is slope significantly non-zero?
			F	9.562
			DFn, DFd	1, 13
			P value	0.0086
			Deviation from zero?	Significant
