# Supplementary material for: Human influenza virus infection elicits distinct patterns of monocyte and dendritic cell mobilization in blood and the nasopharynx
Source: eLife. 2023 Feb 8;12:e77345. doi: 10.7554/eLife.77345 (PMC9977282; doi:10.7554/eLife.77345)
Supplement: Figure 4—source data 9. [file elife-77345-fig4-data9.xlsx]

## Sheet: Sheet1
Age	Log10(plasma TNF)		Log10(NPA TNF)
42	1.50433
41	1.23401
27	1.12969
23	0.92737
50	1.30578
58	1.30578
72	1.30578
59	1.36059
56	1.18752
27	1.23401
77	2.11567
38	1.69178
73	3.2791		3.09384
85	2.63406		3.0788
31	1.5484		1.73546
39	1.91748		1.11812
63	1.82939		1.39248
55	2.11815		1.48073
71	1.48282		1.75178
68	2.02312		3.09913
62	1.32001		1.74141
20	1.22267		0.833475
71	1.21151		1.46392
83	1.9301		0.710893
74	2.23366		1.60731
38	1.42682		0.928978
34	2.37951		1.81951
45	2.12744		1.26261
56			1.24709
98	2.66161		1.63005
	Best-fit values		Best-fit values
	Slope	0.01447	Slope	0.01358
	Y-intercept	0.9235	Y-intercept	0.8622
	X-intercept	-63.81	X-intercept	-63.5
	1/slope	69.09	1/slope	73.64
	Std. Error		Std. Error
	Slope	0.004408	Slope	0.007955
	Y-intercept	0.2563	Y-intercept	0.4986
	95% Confidence Intervals		95% Confidence Intervals
	Slope	0.005430 to 0.02352	Slope	-0.003285 to 0.03044
	Y-intercept	0.3976 to 1.449	Y-intercept	-0.1947 to 1.919
	X-intercept	-261.9 to -17.23	X-intercept	-infinity to 6.622
	Goodness of Fit		Goodness of Fit
	R squared	0.2854	R squared	0.1541
	Sy.x	0.482	Sy.x	0.6926
		r=0.534		r=0.393
	Is slope significantly non-zero?		Is slope significantly non-zero?
	F	10.78	F	2.914
	DFn, DFd	1, 27	DFn, DFd	1, 16
	P value	0.0028	P value	0.1072
	Deviation from zero?	Significant	Deviation from zero?	Not Significant
