# Supplementary material for: Human influenza virus infection elicits distinct patterns of monocyte and dendritic cell mobilization in blood and the nasopharynx
Source: eLife. 2023 Feb 8;12:e77345. doi: 10.7554/eLife.77345 (PMC9977282; doi:10.7554/eLife.77345)
Supplement: Figure 4—source data 10. [file elife-77345-fig4-data10.xlsx]

## Sheet: Sheet1
Ct Value	Log10(Plasma IFN)
23.2	1.60906		Best-fit values
19.3	0.939262		Slope	0.06009
24.9	1.66831		Y-intercept	0.03143
35	1.5737		X-intercept	-0.5231
27.1	1.62973		1/slope	16.64
21.1	1.45673
31.1	2.26659		Std. Error
23.9	1.07049		Slope	0.01731
38.2	2.14046		Y-intercept	0.5009
33.6	2.59354
33.8	2.09822		95% Confidence Intervals
			Slope	0.02092 to 0.09926
			Y-intercept	-1.102 to 1.164
			X-intercept	-54.87 to 11.26
			Goodness of Fit
			R squared	0.5723	r=0.756
			Sy.x	0.3464
			Is slope significantly non-zero?
			F	12.04
			DFn, DFd	1, 9
			P value	0.007
			Deviation from zero?	Significant
