# Supplementary material for: Human influenza virus infection elicits distinct patterns of monocyte and dendritic cell mobilization in blood and the nasopharynx
Source: eLife. 2023 Feb 8;12:e77345. doi: 10.7554/eLife.77345 (PMC9977282; doi:10.7554/eLife.77345)
Supplement: Figure 4—source data 11. [file elife-77345-fig4-data11.xlsx]

## Sheet: Sheet1
Log10(Plasma CCL2)	%IM in blood
2.71446	69.8		Best-fit values
2.13024	5.8		Slope	69.08
2.20809	34.1		Y-intercept	-136.8
2.42852	16.3		X-intercept	1.981
2.40672	11.7		1/slope	0.01448
2.32701	38.5
2.55632	25.9		Std. Error
2.35542	24.4		Slope	33.92
			Y-intercept	81.3
			95% Confidence Intervals
			Slope	-13.91 to 152.1
			Y-intercept	-335.8 to 62.10
			X-intercept	-infinity to 2.250
			Goodness of Fit
			R squared	0.4088	r=0.639
			Sy.x	16.63
			Is slope significantly non-zero?
			F	4.148
			DFn, DFd	1, 6
			P value	0.0478
			Deviation from zero?	Significant
