# Supplementary material for: Human influenza virus infection elicits distinct patterns of monocyte and dendritic cell mobilization in blood and the nasopharynx
Source: eLife. 2023 Feb 8;12:e77345. doi: 10.7554/eLife.77345 (PMC9977282; doi:10.7554/eLife.77345)
Supplement: Figure 4—source data 12. [file elife-77345-fig4-data12.xlsx]

## Sheet: Sheet1
	TNF					IL-6
	NPA		Plasma			NPA		Plasma
	Acute	Convalescent	Acute	Convalescent		Acute	Convalescent	Acute	Convalescent
	30.2504	10.3977	17.14	17.14		110.435	1.20513	24.62	0
	40.4865	4.22668	20.22	17.14		24.6288	0	32.34	0
	65.9943	9.34906	22.94	20.22		608.72	2.14873	21.2	21.2
	18.3067	3.92279	130.518	177.831		4.38	25.5859	36.0441	13.1717
			49.1791	16.0135				26.5049	10.1687
			171.263	14.7348				43.0667	4.38197
			239.612	0				652.731	0
			16.2747	12.9473				307.761	0
			134.104	0				91.315	0
								70.283	48.5574
	Wilcoxon matched-pairs signed rank test		Wilcoxon matched-pairs signed rank test			Wilcoxon matched-pairs signed rank test		Wilcoxon matched-pairs signed rank test
	P value	0.002	P value	0.0178		P value	0.25	P value	0.039
	Exact or approximate P value?	Exact	Exact or approximate P value?	Exact		Exact or approximate P value?	Exact	Exact or approximate P value?	Exact
	P value summary	**	P value summary	*		P value summary	ns	P value summary	*
	Significantly different (P < 0.05)?	No	Significantly different (P < 0.05)?	No		Significantly different (P < 0.05)?	No	Significantly different (P < 0.05)?	Yes
