# Supplementary material for: Human influenza virus infection elicits distinct patterns of monocyte and dendritic cell mobilization in blood and the nasopharynx
Source: eLife. 2023 Feb 8;12:e77345. doi: 10.7554/eLife.77345 (PMC9977282; doi:10.7554/eLife.77345)
Supplement: Figure 5—source data 1. [file elife-77345-fig5-data1.xlsx]

## Sheet: Sheet1
	CM			IM			NCM			PDC			MDC
	Unstim			Unstim			Unstim			Unstim			Unstim
% TNF-producing cells	HC	IAV+		HC	IAV+		HC	IAV+		HC	IAV+		HC	IAV+
	1.55	15.21		2.7	7.76		1.31	1.85		0.1	2.86		6.1	9.84
	1.45	9.95		8.12	4.68		1.28	7.1		0.36	1.35		2.29	11.3
	3.3	48.5		4.88	32.8		1.07	19.2		0.44	0.45		2.86	6.93
	3.09	25.86		5.13	2.99		1.6	6.84		0.27	2.37		2.16	1.37
	2.22	56.6		3.48	47		1.27	22.7		0.11	5.88		2.11	32.4
		9.82			8.42			2.85			1.33			2.13
		6.29			6.8			1.72			6.08			1.34
		12.4			12.9			8.97			6.38			2.55
		9.56			8.01			11.2			1.62			4.36
Median	2.22	12.4		4.88	8.01		1.28	7.1		0.27	2.37		2.29	4.36
	Mann Whitney test			Mann Whitney test			Mann Whitney test			Mann Whitney test			Mann Whitney test
	P value	0.001		P value	0.019		P value	0.006		P value	0.001		P value	0.5185
	Exact or approximate P value?	Exact		Exact or approximate P value?	Exact		Exact or approximate P value?	Exact		Exact or approximate P value?	Exact		Exact or approximate P value?	Exact
	P value summary	***		P value summary	*		P value summary	**		P value summary	***		P value summary	ns
	Significantly different (P < 0.05)?	Yes		Significantly different (P < 0.05)?	No		Significantly different (P < 0.05)?	Yes		Significantly different (P < 0.05)?	Yes		Significantly different (P < 0.05)?	No
