# Supplementary material for: Human influenza virus infection elicits distinct patterns of monocyte and dendritic cell mobilization in blood and the nasopharynx
Source: eLife. 2023 Feb 8;12:e77345. doi: 10.7554/eLife.77345 (PMC9977282; doi:10.7554/eLife.77345)
Supplement: Figure 5—source data 2. [file elife-77345-fig5-data2.xlsx]

## Sheet: Sheet1
	CM						IM						NCM						PDC						MDC
	Unstim		TLR 7/8L stim				Unstim		TLR 7/8L stim				Unstim		TLR 7/8L stim				Unstim		TLR 7/8L stim				Unstim		TLR 7/8L stim
% TNF-producing cells	HC	IAV+	HC	IAV+			HC	IAV+	HC	IAV+			HC	IAV+	HC	IAV+			HC	IAV+	HC	IAV+			HC	IAV+	HC	IAV+
	1.55	15.21	99.1	99.9			2.7	7.76	99.9	99.8			1.31	1.85	97.5	99.6			0.1	2.86	87.7	100			6.1	9.84	91.1	99.5
	1.45	9.95	99.6	99.8			8.12	4.68	99.8	99.8			1.28	7.1	95.4	99.4			0.36	1.35	77.3	96.6			2.29	11.3	86.2	94.6
	3.3	48.5	55.9	98.1			4.88	32.8	63.1	98.4			1.07	19.2	34.7	90.4			0.44	0.45	62.7	94			2.86	6.93	33.1	57.8
	3.09	25.86	31.7	54.8			5.13	2.99	47.2	66.6			1.6	6.84	32.2	79.2			0.27	2.37	41.5	78.2			2.16	1.37	26.3	49.4
	2.22	56.6	44.8	96.6			3.48	47	61.9	93.7			1.27	22.7	33.8	88.8			0.11	5.88	36	94.4			2.11	32.4	30.9	79.3
		9.82		41.7				8.42		66.6				2.85		46.2				1.33		54.6				2.13		35
		6.29		79.9				6.8		78				1.72		57.6				6.08		91.4				1.34		36.4
		12.4		99.6				12.9		100				8.97		99.8				6.38		92.6				2.55		84.2
		9.56		71.6				8.01		78.9				11.2		69.2				1.62		65.4				4.36		33
Median	2.22	12.4	55.9	96.6			4.88	8.01	63.1	93.7			1.28	7.1	34.7	88.8			0.27	2.37	62.7	92.6			2.29	4.36	33.1	57.8
	Two-way RM ANOVA	Matching: Across row					Two-way RM ANOVA	Matching: Across row					Two-way RM ANOVA	Matching: Across row					Two-way RM ANOVA	Matching: Across row					Two-way RM ANOVA	Matching: Across row
	Assume sphericity?	Yes					Assume sphericity?	Yes					Assume sphericity?	Yes					Assume sphericity?	Yes					Assume sphericity?	Yes
	Alpha	0.05					Alpha	0.05					Alpha	0.05					Alpha	0.05					Alpha	0.05
	Source of Variation	% of total variation	P value	P value summary	Significant?		Source of Variation	% of total variation	P value	P value summary	Significant?		Source of Variation	% of total variation	P value	P value summary	Significant?		Source of Variation	% of total variation	P value	P value summary	Significant?		Source of Variation	% of total variation	P value	P value summary	Significant?
	Infection	5.122	0.071	ns	No		Infection	1.882	0.1302	ns	No		Infection	3.564	0.0719	ns	No		Infection	2.636	0.0238	*	Yes		Infection	1.112	0.4382	ns	No
	Stimulation	68.02	<0.0001	****	Yes		Stimulation	84.35	<0.0001	****	Yes		Stimulation	75.55	<0.0001	****	Yes		Stimulation	86.77	<0.0001	****	Yes		Stimulation	64.63	<0.0001	****	Yes
	Subject	15.66	0.234	ns	No		Subject	8.556	0.1581	ns	No		Subject	10.98	0.3721	ns	No		Subject	4.73	0.5892	ns	No		Subject	20.75	0.1878	ns	No
	ANOVA table	SS	DF	MS	F (DFn, DFd)	P value	ANOVA table	SS	DF	MS	F (DFn, DFd)	P value	ANOVA table	SS	DF	MS	F (DFn, DFd)	P value	ANOVA table	SS	DF	MS	F (DFn, DFd)	P value	ANOVA table	SS	DF	MS	F (DFn, DFd)	P value
	Infection	2023	1	2023	F (1, 12) = 3.925	P=0.0710	Infection	793.5	1	793.5	F (1, 12) = 2.639	P=0.1302	Infection	1472	1	1472	F (1, 12) = 3.894	P=0.0719	Infection	1180	1	1180	F (1, 12) = 6.687	P=0.0238	Infection	344.7	1	344.7	F (1, 12) = 0.6430	P=0.4382
	Stimulation	26865	1	26865	F (1, 13) = 78.93	P<0.0001	Stimulation	35574	1	35574	F (1, 13) = 210.5	P<0.0001	Stimulation	31212	1	31212	F (1, 13) = 99.23	P<0.0001	Stimulation	38837	1	38837	F (1, 13) = 192.4	P<0.0001	Stimulation	20039	1	20039	F (1, 13) = 62.15	P<0.0001
	Subject	6186	12	515.5	F (12, 13) = 1.514	P=0.2340	Subject	3608	12	300.7	F (12, 13) = 1.779	P=0.1581	Subject	4537	12	378.1	F (12, 13) = 1.202	P=0.3721	Subject	2117	12	176.4	F (12, 13) = 0.8739	P=0.5892	Subject	6433	12	536	F (12, 13) = 1.663	P=0.1878
	Residual	4425	13	340.4			Residual	2197	13	169			Residual	4089	13	314.5			Residual	2625	13	201.9			Residual	4191	13	322.4
	Difference between row means						Difference between row means						Difference between row means						Difference between row means						Difference between row means
	Mean of HC	34.27					Mean of HC	39.62					Mean of HC	30.01					Mean of HC	30.65					Mean of HC	28.31
	Mean of IAV+	52.01					Mean of IAV+	50.73					Mean of IAV+	45.15					Mean of IAV+	44.2					Mean of IAV+	35.63
	Difference between means	-17.74					Difference between means	-11.11					Difference between means	-15.13					Difference between means	-13.55					Difference between means	-7.322
	SE of difference	8.954					SE of difference	6.839					SE of difference	7.669					SE of difference	5.239					SE of difference	9.132
							95% CI of difference	-26.01 to 3.791					95% CI of difference	-31.84 to 1.576					95% CI of difference	-24.96 to -2.133					95% CI of difference	-27.22 to 12.57
