# Supplementary material for: Human influenza virus infection elicits distinct patterns of monocyte and dendritic cell mobilization in blood and the nasopharynx
Source: eLife. 2023 Feb 8;12:e77345. doi: 10.7554/eLife.77345 (PMC9977282; doi:10.7554/eLife.77345)
Supplement: Figure 6—source data 1. [file elife-77345-fig6-data1.xlsx]

## Sheet: Sheet1
Blood cell yield (x10^6 PBMCs per mL blood)	HC	IAV+	SARS-CoV-2	IBV+	RSV+		Kruskal-Wallis test
	2.6847	1.59375	0.821429	2.33333	1.53333		P value	0.035
	2.06847	1	2.125	1.94444	1.28421		Exact or approximate P value?	Approximate
	2.14785	0.575	2.14815	1.75	2.28277		P value summary	*
	1.8125	2	2	1.14286	0.608974		Do the medians vary signif. (P < 0.05)?	Yes
	1.75	1.77778	1.5	0.49	1.06332		Number of groups	5
	2.375	1.875	0.666667	0.833333	1.71131		Kruskal-Wallis statistic	10.34
	1.2574	2.2	2.90909	1.69231
	1.5	1.21528	1.40625	0.444444			Data summary
	1.15714	1.85714		1.69565			Number of treatments (columns)	5
	2.125	1.76471					Number of values (total)	79
	1.25	0.498188
	1.8125	1.13982					Dunn's multiple comparisons test	Mean rank diff.	Significant?	Summary	Adjusted P Value	A-?
	3.3125	2.72727					HC vs. IAV+	20.69	Yes	**	0.0092	B	IAV+
	2.02578	1.07527					HC vs. SARS-CoV-2	8.438	No	ns	>0.9999	C	SARS-CoV-2
	1.75	1.57895					HC vs. IBV+	19.21	No	ns	0.1782	D	IBV+
	1.6845	1.21528					HC vs. RSV+	17.88	No	ns	0.4148	E	RSV+
		0.618421
		1.21212					Test details	Mean rank 1	Mean rank 2	Mean rank diff.	n1	n2	Z
		0.921053					HC vs. IAV+	54.88	34.19	20.69	16	40	3.048
		1.68776					HC vs. SARS-CoV-2	54.88	46.44	8.438	16	8	0.8491
		1.44462					HC vs. IBV+	54.88	35.67	19.21	16	9	2.009
		1.13032					HC vs. RSV+	54.88	37	17.88	16	6	1.627
		1.30814
		0.773196					Dunn's multiple comparisons test	Mean rank diff.	Significant?	Summary	Adjusted P Value	B-?
		1.78571					IAV+ vs. HC	-20.69	Yes	**	0.0092	A	HC
		1.18797					IAV+ vs. SARS-CoV-2	-12.25	No	ns	0.6724	C	SARS-CoV-2
		1					IAV+ vs. IBV+	-1.479	No	ns	>0.9999	D	IBV+
		2.875					IAV+ vs. RSV+	-2.813	No	ns	>0.9999	E	RSV+
		1.21528
		0.525					Test details	Mean rank 1	Mean rank 2	Mean rank diff.	n1	n2	Z
		1.0625					IAV+ vs. HC	34.19	54.88	-20.69	40	16	3.048
		0.4					IAV+ vs. SARS-CoV-2	34.19	46.44	-12.25	40	8	1.378
		1.36364					IAV+ vs. IBV+	34.19	35.67	-1.479	40	9	0.1747
		0.888889					IAV+ vs. RSV+	34.19	37	-2.813	40	6	0.28
		1.66667
		2.11111
		1.12782
		0.919118
		0.807823
		3.2
Median	1.8125	1.21528	1.75	1.69231	1.40877
