# Supplementary material for: Human influenza virus infection elicits distinct patterns of monocyte and dendritic cell mobilization in blood and the nasopharynx
Source: eLife. 2023 Feb 8;12:e77345. doi: 10.7554/eLife.77345 (PMC9977282; doi:10.7554/eLife.77345)
Supplement: Figure 6—source data 2. [file elife-77345-fig6-data2.xlsx]

## Sheet: Sheet1
total NPA cells (x10^6 )	HC	IAV+	SARS-CoV-2	IBV+	RSV+		Kruskal-Wallis test													HC	IAV+	SARS-CoV-2	IBV+	RSV+
	0.16	0.272	1.14706	4.4	4		P value	0.0068												0.16	0.272	1.14706	4.4	4
	0.24	0.272	7.09091	3.4	3.60656		Exact or approximate P value?	Approximate												0.24	0.272	7.09091		3.60656
	0.15	1.14	7.5	0.003	1.2987		P value summary	**												0.15	1.14	7.5	3.4	1.2987
	0.5	0.15	4.88372	1.2	3.7037		Do the medians vary signif. (P < 0.05)?	Yes												0.5	0.15	4.88372		3.7037
	0	0.64	0.772727	0.585	0.790123		Number of groups	5												0	0.64		0.003	0.790123
	0.3	1.2	0.5	0.9	0.172414		Kruskal-Wallis statistic	14.16												0.3	1.2	0.772727	1.2	0.172414
	0.57	0.82	23.3333	0.31																0.57	0.82	0.5	0.585
	0.56	6.2	0.233766	0.61			Data summary													0.56	6.2		0.9
	0.25	0.4					Number of treatments (columns)	5												0.25	0.4	23.3333	0.31
	0.2	1.1					Number of values (total)	75												0.2	1.1	0.233766	0.61
	0.32	0.609804																		0.32	0.609804
	0.25	1.11688					Dunn's multiple comparisons test	Mean rank diff.	Significant?	Summary	Adjusted P Value	A-?								0.25	1.11688
	0.39	0					HC vs. IAV+	-18.83	Yes	*	0.0273	B	IAV+							0.39	0
		4.36364					HC vs. SARS-CoV-2	-32.56	Yes	**	0.0035	C	SARS-CoV-2								4.36364
		0.507937					HC vs. IBV+	-20.19	No	ns	0.157	D	IBV+								0.507937
		0					HC vs. RSV+	-29.17	Yes	*	0.0268	E	RSV+								0
		3.09524																			3.09524
		3.63636					Test details	Mean rank 1	Mean rank 2	Mean rank diff.	n1	n2	Z								3.63636
		7.86667					HC vs. IAV+	20	38.83	-18.83	13	40	2.706								7.86667
		4.82623					HC vs. SARS-CoV-2	20	52.56	-32.56	13	8	3.325								4.82623
		1.91429					HC vs. IBV+	20	40.19	-20.19	13	8	2.062								1.91429
		0.04					HC vs. RSV+	20	49.17	-29.17	13	6	2.712								0.04
		0.153846																			0.153846
		1.48148					Dunn's multiple comparisons test	Mean rank diff.	Significant?	Summary	Adjusted P Value	B-?									1.48148
		10.1316					IAV+ vs. HC	18.83	Yes	*	0.0273	A	HC								10.1316
		15.7609					IAV+ vs. SARS-CoV-2	-13.74	No	ns	0.4144	C	SARS-CoV-2								15.7609
		0.548387					IAV+ vs. IBV+	-1.363	No	ns	>0.9999	D	IBV+								0.548387
		0.36					IAV+ vs. RSV+	-10.34	No	ns	>0.9999	E	RSV+								0.36
		0																			0
		0.67					Test details	Mean rank 1	Mean rank 2	Mean rank diff.	n1	n2	Z								0.67
		0.2					IAV+ vs. HC	38.83	20	18.83	40	13	2.706								0.2
		0.05					IAV+ vs. SARS-CoV-2	38.83	52.56	-13.74	40	8	1.628								0.05
		0.38					IAV+ vs. IBV+	38.83	40.19	-1.363	40	8	0.1614								0.38
		0.19					IAV+ vs. RSV+	38.83	49.17	-10.34	40	6	1.084								0.19
		0.77																			0.77
		2.2																			2.2
		2.72727																			2.72727
		2.04545																			2.04545
		1.4																			1.4
		0.77																			0.77
Median	0.25	0.77	3.01539	0.755	2.45263
