# Supplementary material for: Human influenza virus infection elicits distinct patterns of monocyte and dendritic cell mobilization in blood and the nasopharynx
Source: eLife. 2023 Feb 8;12:e77345. doi: 10.7554/eLife.77345 (PMC9977282; doi:10.7554/eLife.77345)
Supplement: Figure 6—source data 3. [file elife-77345-fig6-data3.xlsx]

## Sheet: Sheet1
Blood frequency of lin–HLA-DR+ cells (%)	HC	IAV+	SARS-CoV-2	IBV+	RSV+		Kruskal-Wallis test
	10.3786	29.9	10.5	32.4	16.4		P value	<0.0001
	6.08	21.3	6.2	18.1	8.9		Exact or approximate P value?	Approximate
	4.66	20.1	9.9	1.01	25		P value summary	****
	12.75	16.4	14.3	3.05	11.4		Do the medians vary signif. (P < 0.05)?	Yes
	10.282	19	9.1	9.65	22.6		Number of groups	5
	9.65	21.9	20.1				Kruskal-Wallis statistic	24.18
	8.83975	12.2	10.1
	11.04	54.9	6.6				Data summary
	11.624	26.9					Number of treatments (columns)	5
	12.9838	4.98					Number of values (total)	56
	9.2984	22.95
	12.8	12.8					Dunn's multiple comparisons test	Mean rank diff.	Significant?	Summary	Adjusted P Value	A-?
	10.9	27.13					HC vs. IAV+	-23.72	Yes	****	<0.0001	B	IAV+
	8.4	13.2					HC vs. SARS-CoV-2	-2.281	No	ns	>0.9999	C	SARS-CoV-2
	10.4	15.7					HC vs. IBV+	-4.206	No	ns	>0.9999	D	IBV+
	6.2	36.1					HC vs. RSV+	-15.51	No	ns	0.2539	E	RSV+
		34.1
		64.5					Test details	Mean rank 1	Mean rank 2	Mean rank diff.	n1	n2	Z
		33.4					HC vs. IAV+	17.09	40.82	-23.72	16	22	4.428
		16.4					HC vs. SARS-CoV-2	17.09	19.38	-2.281	16	8	0.3231
		18.5					HC vs. IBV+	17.09	21.3	-4.206	16	5	0.5034
		13.5					HC vs. RSV+	17.09	32.6	-15.51	16	5	1.856
Median	10.3303	20.7	10	9.65	16.4
							Dunn's multiple comparisons test	Mean rank diff.	Significant?	Summary	Adjusted P Value	B-?
							IAV+ vs. HC	23.72	Yes	****	<0.0001	A	HC
							IAV+ vs. SARS-CoV-2	21.44	Yes	**	0.0058	C	SARS-CoV-2
							IAV+ vs. IBV+	19.52	No	ns	0.0628	D	IBV+
							IAV+ vs. RSV+	8.218	No	ns	>0.9999	E	RSV+
							Test details	Mean rank 1	Mean rank 2	Mean rank diff.	n1	n2	Z
							IAV+ vs. HC	40.82	17.09	23.72	22	16	4.428
							IAV+ vs. SARS-CoV-2	40.82	19.38	21.44	22	8	3.185
							IAV+ vs. IBV+	40.82	21.3	19.52	22	5	2.416
							IAV+ vs. RSV+	40.82	32.6	8.218	22	5	1.017
