# Supplementary material for: Human influenza virus infection elicits distinct patterns of monocyte and dendritic cell mobilization in blood and the nasopharynx
Source: eLife. 2023 Feb 8;12:e77345. doi: 10.7554/eLife.77345 (PMC9977282; doi:10.7554/eLife.77345)
Supplement: Figure 6—source data 4. [file elife-77345-fig6-data4.xlsx]

## Sheet: Sheet1
NPA frequency of lin–HLA-DR+ cells (%)	HC NPA	IAV+ NPA	SARS-CoV-2	IBV+	RSV+		Kruskal-Wallis test
	2.76	37.4	4	2.89	34.9		P value	0.0006
	2.64	28.5	10.4	0.69	5.3		Exact or approximate P value?	Approximate
	1.88	47.3	11.4	5.26	19.6		P value summary	***
	1.3	72.6	0.8	13.4	3.16		Do the medians vary signif. (P < 0.05)?	Yes
	36.7	18.7	6.9	1.28	20.3		Number of groups	5
	0.65	11.37	1.2				Kruskal-Wallis statistic	19.67
	2.5	2.77	41.3
	2.046	5.73	11.2				Data summary
	2.94	44.7					Number of treatments (columns)	5
	3.09	58.3					Number of values (total)	52
	7.9	11.9
	2.65	20.7					Dunn's multiple comparisons test	Mean rank diff.	Significant?	Summary	Adjusted P Value	A-?
		2.97					HC NPA vs. IAV+ NPA	-21.51	Yes	***	0.0003	B	IAV+ NPA
		9.7					HC NPA vs. SARS-CoV-2	-9.667	No	ns	0.649	C	SARS-CoV-2
		8.66					HC NPA vs. IBV+	-2.067	No	ns	>0.9999	D	IBV+
		13.09					HC NPA vs. RSV+	-19.57	No	ns	0.0611	E	RSV+
		9.16
		11.46					Test details	Mean rank 1	Mean rank 2	Mean rank diff.	n1	n2	Z
		9.9					HC NPA vs. IAV+ NPA	13.83	35.34	-21.51	12	22	3.955
		13.4					HC NPA vs. SARS-CoV-2	13.83	23.5	-9.667	12	8	1.398
		12.1					HC NPA vs. IBV+	13.83	15.9	-2.067	12	5	0.2562
		12.9					HC NPA vs. RSV+	13.83	33.4	-19.57	12	5	2.426
Median	2.645	12.5	8.65	2.89	19.6
							Dunn's multiple comparisons test	Mean rank diff.	Significant?	Summary	Adjusted P Value	B-?
							IAV+ NPA vs. HC NPA	21.51	Yes	***	0.0003	A	HC NPA
							IAV+ NPA vs. SARS-CoV-2	11.84	No	ns	0.2337	C	SARS-CoV-2
							IAV+ NPA vs. IBV+	19.44	Yes	*	0.0385	D	IBV+
							IAV+ NPA vs. RSV+	1.941	No	ns	>0.9999	E	RSV+
							Test details	Mean rank 1	Mean rank 2	Mean rank diff.	n1	n2	Z
							IAV+ NPA vs. HC NPA	35.34	13.83	21.51	22	12	3.955
							IAV+ NPA vs. SARS-CoV-2	35.34	23.5	11.84	22	8	1.893
							IAV+ NPA vs. IBV+	35.34	15.9	19.44	22	5	2.589
							IAV+ NPA vs. RSV+	35.34	33.4	1.941	22	5	0.2585
