# Supplementary material for: Human influenza virus infection elicits distinct patterns of monocyte and dendritic cell mobilization in blood and the nasopharynx
Source: eLife. 2023 Feb 8;12:e77345. doi: 10.7554/eLife.77345 (PMC9977282; doi:10.7554/eLife.77345)
Supplement: Figure 6—source data 5. [file elife-77345-fig6-data5.xlsx]

## Sheet: Sheet1
	Blood								NPA
Frequency of CM/lin–HLA-DR+ cells (%)	HC	IAV+	SARS-CoV-2	IBV+	RSV+				HC	IAV+	SARS-CoV-2	IBV+	RSV+
	43.5	41.6	63.5	51.6	69.4				0	78.66	38.1	13.5	40
	61.1	27.9	55.9	64	57				11.7	80.76	2.1	23.6	22.8
	61.1	61.822	68.6	5.46	50.8				9.8	16.66	2	67	78.9
	66.5	72.84	57.2	52.5	25.8				25	67.54	1.4	33.8	14.5
	71	61.06	25.1	64.1	65.2				36.7	76.9	6.7	21.5	78.5
	73.9	71.48	83.4						5.33	80.6	37.2
	54.6	14.8	17.4						11.7	41.48	0.1
	59.3	62.38	41.2						32.6	29.008	53.6
	74.8	69.26							48.6	84.96
	71.5	66.2							6.57	86
	61.3	51.76							3.39	74.64
	62	53.3							38.4	14.9
		52.988								51.46
		14.636								55.3
		49.2881								15.18
		53.526								31.418
		70.412								26.238
		53.158								19.278
		72.5901
		58.38
		59.654
		63.7974
Median	61.65	59.017	56.55	52.5	57				11.7	53.38	4.4	23.6	40
	Kruskal-Wallis test								Kruskal-Wallis test
	P value	0.3773							P value	0.0041
	Exact or approximate P value?	Approximate							Exact or approximate P value?	Approximate
	P value summary	ns							P value summary	**
	Do the medians vary signif. (P < 0.05)?	No							Do the medians vary signif. (P < 0.05)?	Yes
	Number of groups	5							Number of groups	5
	Kruskal-Wallis statistic	4.218							Kruskal-Wallis statistic	15.34
	Data summary								Data summary
	Number of treatments (columns)	5							Number of treatments (columns)	5
	Number of values (total)	52							Number of values (total)	48
	Dunn's multiple comparisons test	Mean rank diff.	Significant?	Summary	Adjusted P Value	A-?			Dunn's multiple comparisons test	Mean rank diff.	Significant?	Summary	Adjusted P Value	I-?
	HC vs. IAV+	8.462	No	ns	0.4789	B	IAV+		HC vs. IAV+	-16.56	Yes	**	0.006	J	IAV+
	HC vs. SARS-CoV-2	10.42	No	ns	0.5283	C	SARS-CoV-2		HC vs. SARS-CoV-2	1.583	No	ns	>0.9999	K	SARS-CoV-2
	HC vs. IBV+	13.52	No	ns	0.3752	D	IBV+		HC vs. IBV+	-7.267	No	ns	>0.9999	L	IBV+
	HC vs. RSV+	9.717	No	ns	0.9135	E	RSV+		HC vs. RSV+	-14.07	No	ns	0.2363	M	RSV+
	Test details	Mean rank 1	Mean rank 2	Mean rank diff.	n1	n2	Z		Test details	Mean rank 1	Mean rank 2	Mean rank diff.	n1	n2	Z
	HC vs. IAV+	33.92	25.45	8.462	12	22	1.556		HC vs. IAV+	16.33	32.89	-16.56	12	18	3.173
	HC vs. SARS-CoV-2	33.92	23.5	10.42	12	8	1.506		HC vs. SARS-CoV-2	16.33	14.75	1.583	12	8	0.2478
	HC vs. IBV+	33.92	20.4	13.52	12	5	1.676		HC vs. IBV+	16.33	23.6	-7.267	12	5	0.9751
	HC vs. RSV+	33.92	24.2	9.717	12	5	1.205		HC vs. RSV+	16.33	30.4	-14.07	12	5	1.888
	Dunn's multiple comparisons test	Mean rank diff.	Significant?	Summary	Adjusted P Value	B-?			Dunn's multiple comparisons test	Mean rank diff.	Significant?	Summary	Adjusted P Value	J-?
	IAV+ vs. HC	-8.462	No	ns	0.4789	A	HC		IAV+ vs. HC	16.56	Yes	**	0.006	I	HC
	IAV+ vs. SARS-CoV-2	1.955	No	ns	>0.9999	C	SARS-CoV-2		IAV+ vs. SARS-CoV-2	18.14	Yes	**	0.0092	K	SARS-CoV-2
	IAV+ vs. IBV+	5.055	No	ns	>0.9999	D	IBV+		IAV+ vs. IBV+	9.289	No	ns	0.7574	L	IBV+
	IAV+ vs. RSV+	1.255	No	ns	>0.9999	E	RSV+		IAV+ vs. RSV+	2.489	No	ns	>0.9999	M	RSV+
	Test details	Mean rank 1	Mean rank 2	Mean rank diff.	n1	n2	Z		Test details	Mean rank 1	Mean rank 2	Mean rank diff.	n1	n2	Z
	IAV+ vs. HC	25.45	33.92	-8.462	22	12	1.556		IAV+ vs. HC	32.89	16.33	16.56	18	12	3.173
	IAV+ vs. SARS-CoV-2	25.45	23.5	1.955	22	8	0.3124		IAV+ vs. SARS-CoV-2	32.89	14.75	18.14	18	8	3.049
	IAV+ vs. IBV+	25.45	20.4	5.055	22	5	0.6732		IAV+ vs. IBV+	32.89	23.6	9.289	18	5	1.313
	IAV+ vs. RSV+	25.45	24.2	1.255	22	5	0.1671		IAV+ vs. RSV+	32.89	30.4	2.489	18	5	0.3517
