# Supplementary material for: Human influenza virus infection elicits distinct patterns of monocyte and dendritic cell mobilization in blood and the nasopharynx
Source: eLife. 2023 Feb 8;12:e77345. doi: 10.7554/eLife.77345 (PMC9977282; doi:10.7554/eLife.77345)
Supplement: Figure 6—source data 6. [file elife-77345-fig6-data6.xlsx]

## Sheet: Sheet1
	Blood								NPA
Frequency of IM/lin–HLA-DR+ cells (%)	HC	IAV+	SARS-CoV-2	IBV+	RSV+				HC	IAV+	SARS-CoV-2	IBV+	RSV+
	2.72	28	12.2	38.3	10.2				0	0.37	1	1.52	41.9
	11.5	22.7	7.9	7.75	26.4				0	11.7	0	3.02	4.1
	12.7	26.5	4.9	4.73	23.7				0	15.6	0	9.05	15.6
	3.63	10.3	23.4	3.49	41				0	26.3	0	1.35	3.64
	3.78	19.1	8.2	10	23				1.67	21.9	0	13.4	9.02
	10.9	15.1	4.9						0	12.1	3.8
	11.1	69.8	58.9						2.7	3.57	0
	4.33	24.1	35.9						3.7	3.11	2.7
	6.99	25.3							3.98	7
	1.56	5.8							0	11
	8.81	14.8							0	12.9
	6.99	14.8							3.93	5.65
		34.1								38.7
		60.8								27.3
		22.8								13.5
		34.1								8.7
		16.3								5.26
		40.9								33.1
		11.7
		38.5
		25.9
		24.4
Median	6.99	24.25	10.2	7.75	23.7				0	11.9	0	3.02	9.02
	Kruskal-Wallis test								Kruskal-Wallis test
	P value	0.0002							P value	<0.0001
	Exact or approximate P value?	Approximate							Exact or approximate P value?	Approximate
	P value summary	***							P value summary	****
	Do the medians vary signif. (P < 0.05)?	Yes							Do the medians vary signif. (P < 0.05)?	Yes
	Number of groups	5							Number of groups	5
	Kruskal-Wallis statistic	21.56							Kruskal-Wallis statistic	28.31
	Data summary								Data summary
	Number of treatments (columns)	5							Number of treatments (columns)	5
	Number of values (total)	52							Number of values (total)	48
	Dunn's multiple comparisons test	Mean rank diff.	Significant?	Summary	Adjusted P Value	A-?			Dunn's multiple comparisons test	Mean rank diff.	Significant?	Summary	Adjusted P Value	I-?
	HC vs. IAV+	-23.05	Yes	****	<0.0001	B	IAV+		HC vs. IAV+	-21.86	Yes	****	<0.0001	J	IAV+
	HC vs. SARS-CoV-2	-12.79	No	ns	0.2576	C	SARS-CoV-2		HC vs. SARS-CoV-2	1.917	No	ns	>0.9999	K	SARS-CoV-2
	HC vs. IBV+	-5.117	No	ns	>0.9999	D	IBV+		HC vs. IBV+	-11.63	No	ns	0.4625	L	IBV+
	HC vs. RSV+	-22.92	Yes	*	0.018	E	RSV+		HC vs. RSV+	-21.53	Yes	*	0.0143	M	RSV+
	Test details	Mean rank 1	Mean rank 2	Mean rank diff.	n1	n2	Z		Test details	Mean rank 1	Mean rank 2	Mean rank diff.	n1	n2	Z
	HC vs. IAV+	12.08	35.14	-23.05	12	22	4.239		HC vs. IAV+	13.17	35.03	-21.86	12	18	4.223
	HC vs. SARS-CoV-2	12.08	24.88	-12.79	12	8	1.849		HC vs. SARS-CoV-2	13.17	11.25	1.917	12	8	0.3023
	HC vs. IBV+	12.08	17.2	-5.117	12	5	0.6343		HC vs. IBV+	13.17	24.8	-11.63	12	5	1.573
	HC vs. RSV+	12.08	35	-22.92	12	5	2.841		HC vs. RSV+	13.17	34.7	-21.53	12	5	2.912
	Dunn's multiple comparisons test	Mean rank diff.	Significant?	Summary	Adjusted P Value	B-?			Dunn's multiple comparisons test	Mean rank diff.	Significant?	Summary	Adjusted P Value	J-?
	IAV+ vs. HC	23.05	Yes	****	<0.0001	A	HC		IAV+ vs. HC	21.86	Yes	****	<0.0001	I	HC
	IAV+ vs. SARS-CoV-2	10.26	No	ns	0.4039	C	SARS-CoV-2		IAV+ vs. SARS-CoV-2	23.78	Yes	***	0.0002	K	SARS-CoV-2
	IAV+ vs. IBV+	17.94	No	ns	0.0676	D	IBV+		IAV+ vs. IBV+	10.23	No	ns	0.5809	L	IBV+
	IAV+ vs. RSV+	0.1364	No	ns	>0.9999	E	RSV+		IAV+ vs. RSV+	0.3278	No	ns	>0.9999	M	RSV+
	Test details	Mean rank 1	Mean rank 2	Mean rank diff.	n1	n2	Z		Test details	Mean rank 1	Mean rank 2	Mean rank diff.	n1	n2	Z
	IAV+ vs. HC	35.14	12.08	23.05	22	12	4.239		IAV+ vs. HC	35.03	13.17	21.86	18	12	4.223
	IAV+ vs. SARS-CoV-2	35.14	24.88	10.26	22	8	1.64		IAV+ vs. SARS-CoV-2	35.03	11.25	23.78	18	8	4.029
	IAV+ vs. IBV+	35.14	17.2	17.94	22	5	2.389		IAV+ vs. IBV+	35.03	24.8	10.23	18	5	1.457
	IAV+ vs. RSV+	35.14	35	0.1364	22	5	0.01816		IAV+ vs. RSV+	35.03	34.7	0.3278	18	5	0.04668
