# Supplementary material for: Human influenza virus infection elicits distinct patterns of monocyte and dendritic cell mobilization in blood and the nasopharynx
Source: eLife. 2023 Feb 8;12:e77345. doi: 10.7554/eLife.77345 (PMC9977282; doi:10.7554/eLife.77345)
Supplement: Figure 6—source data 7. [file elife-77345-fig6-data7.xlsx]

## Sheet: Sheet1
	Blood								NPA
Frequency of NCM/lin–HLA-DR+ cells (%)	HC	IAV+	SARS-CoV-2	IBV+	RSV+				HC	IAV+	SARS-CoV-2	IBV+	RSV+
	3.5	4.88	6.6	3.57	0.56				0.027	0.057	0.5	0.33	0.23
	12.1	1	2.9	1.72	6.06				0	0.77	0	24.1	0.8
	11.3	3.6	3	22.5	2.62					2.22	0.3	0.68	0.028
	7.32	8.29	1.8	6.13	6.17				0.017	0.22	0.1	0	0
	4.84	0.59	2.7	8.61	3.96				0	0.078	0.2	1.49	0.14
	5.11	3.5	0.3						0.29	0.17	0
	7.12	5.3	4						0.0548	0	0
	6.45	0.86	14.4						0.32	1.47	0
	3.46	0.86							0	0.84
	2.62	0.13							0.98	0.14
	13.3	6.38							0.87	0.015
		6.62							0.21	1.21
		5.66								0
		14.3								0.61
		4.28								0.9
		1.98								4.09
		4.4								0
		3.64								0.51
		4.84
		0.26
		8.21
		2.62
Median	6.45	3.96	2.95	6.13	3.96				0.0548	0.365	0.05	0.68	0.14
	Kruskal-Wallis test								Kruskal-Wallis test
	P value	0.2206							P value	0.1581
	Exact or approximate P value?	Approximate							Exact or approximate P value?	Approximate
	P value summary	ns							P value summary	ns
	Do the medians vary signif. (P < 0.05)?	No							Do the medians vary signif. (P < 0.05)?	No
	Number of groups	5							Number of groups	5
	Kruskal-Wallis statistic	5.725							Kruskal-Wallis statistic	6.608
	Data summary								Data summary
	Number of treatments (columns)	5							Number of treatments (columns)	5
	Number of values (total)	51							Number of values (total)	47
	Dunn's multiple comparisons test	Mean rank diff.	Significant?	Summary	Adjusted P Value	A-?			Dunn's multiple comparisons test	Mean rank diff.	Significant?	Summary	Adjusted P Value	I-?
	HC vs. IAV+	10.77	No	ns	0.1987	B	IAV+		HC vs. IAV+	-6.838	No	ns	0.7552	J	IAV+
	HC vs. SARS-CoV-2	11.94	No	ns	0.3351	C	SARS-CoV-2		HC vs. SARS-CoV-2	4.398	No	ns	>0.9999	K	SARS-CoV-2
	HC vs. IBV+	1.618	No	ns	>0.9999	D	IBV+		HC vs. IBV+	-11.93	No	ns	0.4155	L	IBV+
	HC vs. RSV+	11.62	No	ns	0.5891	E	RSV+		HC vs. RSV+	-0.8273	No	ns	>0.9999	M	RSV+
	Test details	Mean rank 1	Mean rank 2	Mean rank diff.	n1	n2	Z		Test details	Mean rank 1	Mean rank 2	Mean rank diff.	n1	n2	Z
	HC vs. IAV+	33.82	23.05	10.77	11	22	1.963		HC vs. IAV+	20.77	27.61	-6.838	11	18	1.314
	HC vs. SARS-CoV-2	33.82	21.88	11.94	11	8	1.729		HC vs. SARS-CoV-2	20.77	16.38	4.398	11	8	0.6961
	HC vs. IBV+	33.82	32.2	1.618	11	5	0.2018		HC vs. IBV+	20.77	32.7	-11.93	11	5	1.626
	HC vs. RSV+	33.82	22.2	11.62	11	5	1.449		HC vs. RSV+	20.77	21.6	-0.8273	11	5	0.1128
	Dunn's multiple comparisons test	Mean rank diff.	Significant?	Summary	Adjusted P Value	B-?			Dunn's multiple comparisons test	Mean rank diff.	Significant?	Summary	Adjusted P Value	J-?
	IAV+ vs. HC	-10.77	No	ns	0.1987	A	HC		IAV+ vs. HC	6.838	No	ns	0.7552	I	HC
	IAV+ vs. SARS-CoV-2	1.17	No	ns	>0.9999	C	SARS-CoV-2		IAV+ vs. SARS-CoV-2	11.24	No	ns	0.2072	K	SARS-CoV-2
	IAV+ vs. IBV+	-9.155	No	ns	0.8552	D	IBV+		IAV+ vs. IBV+	-5.089	No	ns	>0.9999	L	IBV+
	IAV+ vs. RSV+	0.8455	No	ns	>0.9999	E	RSV+		IAV+ vs. RSV+	6.011	No	ns	>0.9999	M	RSV+
	Test details	Mean rank 1	Mean rank 2	Mean rank diff.	n1	n2	Z		Test details	Mean rank 1	Mean rank 2	Mean rank diff.	n1	n2	Z
	IAV+ vs. HC	23.05	33.82	-10.77	22	11	1.963		IAV+ vs. HC	27.61	20.77	6.838	18	11	1.314
	IAV+ vs. SARS-CoV-2	23.05	21.88	1.17	22	8	0.1907		IAV+ vs. SARS-CoV-2	27.61	16.38	11.24	18	8	1.945
	IAV+ vs. IBV+	23.05	32.2	-9.155	22	5	1.243		IAV+ vs. IBV+	27.61	32.7	-5.089	18	5	0.7403
	IAV+ vs. RSV+	23.05	22.2	0.8455	22	5	0.1148		IAV+ vs. RSV+	27.61	21.6	6.011	18	5	0.8745
