# Supplementary material for: Human influenza virus infection elicits distinct patterns of monocyte and dendritic cell mobilization in blood and the nasopharynx
Source: eLife. 2023 Feb 8;12:e77345. doi: 10.7554/eLife.77345 (PMC9977282; doi:10.7554/eLife.77345)
Supplement: Figure 6—source data 8. [file elife-77345-fig6-data8.xlsx]

## Sheet: Sheet1
	Blood								NPA
Frequency of cDC2/lin–HLA-DR+ cells (%)	HC	IAV+	SARS-CoV-2	IBV+	RSV+				HC	IAV+	SARS-CoV-2	IBV+	RSV+
	4.18	0	4.9	0.53	0.46				0.016901	0.24	7.1	0.88	1.04
	4.08	0.33	6.6	0.91	0.67				0.8234	1.01	3.1	1.47	0.57
	2.48	0.13	5.5	0.081	3.83				0.0222	1.69	3.9	0.047	0.093
	3.04	1.69	1.2	0.95	1.48				0	1.3	4	2.7	29.1
	1.73	0.52	0.1	0.63	1.81				0.0617	0.23	1.6	1.32	1.3
	11.1	0.23	0.4						0.26717	1.82	1.3
	6.86	1.21	0.7						0.0544	1.98	0.4
	4.29	0.64	0.2						0.3677	5.09	1
	5.64	0.42							0	1.3
	3.65	1.09							0.0017	0.85
	2.65	3.74							0.13697	0.51
	3.47	5.08							0	13.7
	7.06	0.57							0.003	2.68
	2.88	0.24								1.28
	4.07	1.41								3.14
		0.089								3.02
		0.53								10.5
		0.2								0.32
		0.22
		0.038
		0.42
		0.34
Median	4.07	0.42	0.95	0.63	1.48				0.0222	1.495	2.35	1.32	1.04
	Kruskal-Wallis test								Kruskal-Wallis test
	P value	<0.0001							P value	<0.0001
	Exact or approximate P value?	Approximate							Exact or approximate P value?	Approximate
	P value summary	****							P value summary	****
	Do the medians vary signif. (P < 0.05)?	Yes							Do the medians vary signif. (P < 0.05)?	Yes
	Number of groups	5							Number of groups	5
	Kruskal-Wallis statistic	24.67							Kruskal-Wallis statistic	24.66
	Data summary								Data summary
	Number of treatments (columns)	5							Number of treatments (columns)	5
	Number of values (total)	55							Number of values (total)	49
	Dunn's multiple comparisons test	Mean rank diff.	Significant?	Summary	Adjusted P Value	A-?			Dunn's multiple comparisons test	Mean rank diff.	Significant?	Summary	Adjusted P Value	I-?
	HC vs. IAV+	25.77	Yes	****	<0.0001	B	IAV+		HC vs. IAV+	-22.66	Yes	****	<0.0001	J	IAV+
	HC vs. SARS-CoV-2	15.19	No	ns	0.1214	C	SARS-CoV-2		HC vs. SARS-CoV-2	-26.32	Yes	***	0.0002	K	SARS-CoV-2
	HC vs. IBV+	24.5	Yes	*	0.0122	D	IBV+		HC vs. IBV+	-18.38	No	ns	0.0578	L	IBV+
	HC vs. RSV+	13.8	No	ns	0.3811	E	RSV+		HC vs. RSV+	-18.48	No	ns	0.0557	M	RSV+
	Test details	Mean rank 1	Mean rank 2	Mean rank diff.	n1	n2	Z		Test details	Mean rank 1	Mean rank 2	Mean rank diff.	n1	n2	Z
	HC vs. IAV+	44	18.23	25.77	15	22	4.805		HC vs. IAV+	8.615	31.28	-22.66	13	18	4.359
	HC vs. SARS-CoV-2	44	28.81	15.19	15	8	2.165		HC vs. SARS-CoV-2	8.615	34.94	-26.32	13	8	4.101
	HC vs. IBV+	44	19.5	24.5	15	5	2.962		HC vs. IBV+	8.615	27	-18.38	13	5	2.446
	HC vs. RSV+	44	30.2	13.8	15	5	1.668		HC vs. RSV+	8.615	27.1	-18.48	13	5	2.459
	Dunn's multiple comparisons test	Mean rank diff.	Significant?	Summary	Adjusted P Value	B-?			Dunn's multiple comparisons test	Mean rank diff.	Significant?	Summary	Adjusted P Value	J-?
	IAV+ vs. HC	-25.77	Yes	****	<0.0001	A	HC		IAV+ vs. HC	22.66	Yes	****	<0.0001	I	HC
	IAV+ vs. SARS-CoV-2	-10.59	No	ns	0.438	C	SARS-CoV-2		IAV+ vs. SARS-CoV-2	-3.66	No	ns	>0.9999	K	SARS-CoV-2
	IAV+ vs. IBV+	-1.273	No	ns	>0.9999	D	IBV+		IAV+ vs. IBV+	4.278	No	ns	>0.9999	L	IBV+
	IAV+ vs. RSV+	-11.97	No	ns	0.5257	E	RSV+		IAV+ vs. RSV+	4.178	No	ns	>0.9999	M	RSV+
	Test details	Mean rank 1	Mean rank 2	Mean rank diff.	n1	n2	Z		Test details	Mean rank 1	Mean rank 2	Mean rank diff.	n1	n2	Z
	IAV+ vs. HC	18.23	44	-25.77	22	15	4.805		IAV+ vs. HC	31.28	8.615	22.66	18	13	4.359
	IAV+ vs. SARS-CoV-2	18.23	28.81	-10.59	22	8	1.6		IAV+ vs. SARS-CoV-2	31.28	34.94	-3.66	18	8	0.603
	IAV+ vs. IBV+	18.23	19.5	-1.273	22	5	0.1604		IAV+ vs. IBV+	31.28	27	4.278	18	5	0.5924
	IAV+ vs. RSV+	18.23	30.2	-11.97	22	5	1.509		IAV+ vs. RSV+	31.28	27.1	4.178	18	5	0.5786
