# Supplementary material for: Human influenza virus infection elicits distinct patterns of monocyte and dendritic cell mobilization in blood and the nasopharynx
Source: eLife. 2023 Feb 8;12:e77345. doi: 10.7554/eLife.77345 (PMC9977282; doi:10.7554/eLife.77345)
Supplement: Figure 6—source data 9. [file elife-77345-fig6-data9.xlsx]

## Sheet: Sheet1
	Blood								NPA
Frequency of cDC1/lin–HLA-DR+ cells (%)	HC	IAV+	SARS-CoV-2	IBV+	RSV+				HC	IAV+	SARS-CoV-2	IBV+	RSV+
	0.57	0.12	0.2	0.021	0.018				0.142	0.35	0.5	0.23	0.23
	0.56	0.13	1.1	0.02	0.043				0	0.29	0.1	0	0.47
	0.18	0.026	0.4	0	0.14				0.9	1.28	0.1	0.17	0.23
	0.12	0.093	0.1	0.23	0.06				0	1.14	0.1	0.88	0
	0.22	0.093	0	0.15	0.079				0	0.86	0.1	0.68	0.68
	0.77	0.12	0						0	3.57	0
	0.33	0.14	0.1						0.33	1.23	0
	0.36	0.037	0						0.052	0.31	0.1
	0.44	0.058							0	0.086
	0.32	0.09							0.52	0.69
	0.12	0.11							0	0.38
	0.15	0.33							0	0
	0.46	0.067							0.015	2.22
	0.38	0.19								1.3
	0.47	0.032								0.68
		0.0199								1.1
		0.703								0.23
		0.019								1.45
		0.022
		0.053
		0.875
		0.022
Median	0.36	0.0915	0.1	0.021	0.06				0	0.775	0.1	0.23	0.23
	Kruskal-Wallis test								Kruskal-Wallis test
	P value	0.0014							P value	0.0009
	Exact or approximate P value?	Approximate							Exact or approximate P value?	Approximate
	P value summary	**							P value summary	***
	Do the medians vary signif. (P < 0.05)?	Yes							Do the medians vary signif. (P < 0.05)?	Yes
	Number of groups	5							Number of groups	5
	Kruskal-Wallis statistic	17.73							Kruskal-Wallis statistic	18.68
	Data summary								Data summary
	Number of treatments (columns)	5							Number of treatments (columns)	5
	Number of values (total)	55							Number of values (total)	49
	Dunn's multiple comparisons test	Mean rank diff.	Significant?	Summary	Adjusted P Value	A-?			Dunn's multiple comparisons test	Mean rank diff.	Significant?	Summary	Adjusted P Value	I-?
	HC vs. IAV+	18.69	Yes	**	0.002	B	IAV+		HC vs. IAV+	-20.31	Yes	***	0.0003	J	IAV+
	HC vs. SARS-CoV-2	18.03	Yes	*	0.0405	C	SARS-CoV-2		HC vs. SARS-CoV-2	-1.808	No	ns	>0.9999	K	SARS-CoV-2
	HC vs. IBV+	23.67	Yes	*	0.0168	D	IBV+		HC vs. IBV+	-10.61	No	ns	0.6196	L	IBV+
	HC vs. RSV+	24.37	Yes	*	0.0128	E	RSV+		HC vs. RSV+	-9.508	No	ns	0.8094	M	RSV+
	Test details	Mean rank 1	Mean rank 2	Mean rank diff.	n1	n2	Z		Test details	Mean rank 1	Mean rank 2	Mean rank diff.	n1	n2	Z
	HC vs. IAV+	42.47	23.77	18.69	15	22	3.486		HC vs. IAV+	15.19	35.5	-20.31	13	18	3.937
	HC vs. SARS-CoV-2	42.47	24.44	18.03	15	8	2.572		HC vs. SARS-CoV-2	15.19	17	-1.808	13	8	0.2839
	HC vs. IBV+	42.47	18.8	23.67	15	5	2.862		HC vs. IBV+	15.19	25.8	-10.61	13	5	1.422
	HC vs. RSV+	42.47	18.1	24.37	15	5	2.947		HC vs. RSV+	15.19	24.7	-9.508	13	5	1.275
	Dunn's multiple comparisons test	Mean rank diff.	Significant?	Summary	Adjusted P Value	B-?			Dunn's multiple comparisons test	Mean rank diff.	Significant?	Summary	Adjusted P Value	J-?
	IAV+ vs. HC	-18.69	Yes	**	0.002	A	HC		IAV+ vs. HC	20.31	Yes	***	0.0003	I	HC
	IAV+ vs. SARS-CoV-2	-0.6648	No	ns	>0.9999	C	SARS-CoV-2		IAV+ vs. SARS-CoV-2	18.5	Yes	**	0.0085	K	SARS-CoV-2
	IAV+ vs. IBV+	4.973	No	ns	>0.9999	D	IBV+		IAV+ vs. IBV+	9.7	No	ns	0.703	L	IBV+
	IAV+ vs. RSV+	5.673	No	ns	>0.9999	E	RSV+		IAV+ vs. RSV+	10.8	No	ns	0.5267	M	RSV+
	Test details	Mean rank 1	Mean rank 2	Mean rank diff.	n1	n2	Z		Test details	Mean rank 1	Mean rank 2	Mean rank diff.	n1	n2	Z
	IAV+ vs. HC	23.77	42.47	-18.69	22	15	3.486		IAV+ vs. HC	35.5	15.19	20.31	18	13	3.937
	IAV+ vs. SARS-CoV-2	23.77	24.44	-0.6648	22	8	0.1006		IAV+ vs. SARS-CoV-2	35.5	17	18.5	18	8	3.072
	IAV+ vs. IBV+	23.77	18.8	4.973	22	5	0.6268		IAV+ vs. IBV+	35.5	25.8	9.7	18	5	1.354
	IAV+ vs. RSV+	23.77	18.1	5.673	22	5	0.715		IAV+ vs. RSV+	35.5	24.7	10.8	18	5	1.508
