# Supplementary material for: Human influenza virus infection elicits distinct patterns of monocyte and dendritic cell mobilization in blood and the nasopharynx
Source: eLife. 2023 Feb 8;12:e77345. doi: 10.7554/eLife.77345 (PMC9977282; doi:10.7554/eLife.77345)
Supplement: Figure 6—source data 10. [file elife-77345-fig6-data10.xlsx]

## Sheet: Sheet1
	Blood								NPA
Frequency of PDC/lin–HLA-DR+ cells (%)	HC	IAV+	SARS-CoV-2	IBV+	RSV+				HC	IAV+	SARS-CoV-2	IBV+	RSV+
	4.56	1.27	4.2	2.26	1.95				0.15	1.38	8.6	0.67	8.79
	4.15	1.16	9.1	1.11	3.15				0.2	1.64	2	3.41	2.74
	4.31	1.06	3.4	3.34	11.4				0.185	4.44	0.8	4.59	0.95
	7.96	2.01	2.4	6.93	2.17				0.185	1.68	0.9	2.7	3.64
	8.07	11.5	1.6	3.05	1.55				0.358	0.079	12.9	11.3	3.79
	10.3	3.05	0.7						0.266	1.12	7.7
	11.6	3.66	1.9						0.106	14.3	0.1
	8.8	5.8	4.9						0.37	1.53	16.1
	8.84	1.41							0.214	0.81
	7.08	1.58							0.34	0.19
	6.3	6.62							0.28	0.39
	4.55	4.97							0.18	0
	10.9	4.41							0.52	0.38
	8.57	0.29								5.26
	7.19	2.68								0.45
		0.96								10.3
		1.82								0
		0.87								8.25
		3.41
		1.05
		1.86
		1.87
Median	7.96	1.865	2.9	3.05	2.17				0.214	1.25	4.85	3.41	3.64
	Kruskal-Wallis test								Kruskal-Wallis test
	P value	0.0003							P value	0.0009
	Exact or approximate P value?	Approximate							Exact or approximate P value?	Approximate
	P value summary	***							P value summary	***
	Do the medians vary signif. (P < 0.05)?	Yes							Do the medians vary signif. (P < 0.05)?	Yes
	Number of groups	5							Number of groups	5
	Kruskal-Wallis statistic	20.82							Kruskal-Wallis statistic	18.63
	Data summary								Data summary
	Number of treatments (columns)	5							Number of treatments (columns)	5
	Number of values (total)	55							Number of values (total)	49
	Dunn's multiple comparisons test	Mean rank diff.	Significant?	Summary	Adjusted P Value	A-?			Dunn's multiple comparisons test	Mean rank diff.	Significant?	Summary	Adjusted P Value	I-?
	HC vs. IAV+	23.92	Yes	****	<0.0001	B	IAV+		HC vs. IAV+	-13.43	Yes	*	0.0392	J	IAV+
	HC vs. SARS-CoV-2	18.54	Yes	*	0.0328	C	SARS-CoV-2		HC vs. SARS-CoV-2	-21.15	Yes	**	0.0039	K	SARS-CoV-2
	HC vs. IBV+	19.37	No	ns	0.0769	D	IBV+		HC vs. IBV+	-23.15	Yes	**	0.0083	L	IBV+
	HC vs. RSV+	18.07	No	ns	0.1159	E	RSV+		HC vs. RSV+	-23.55	Yes	**	0.0069	M	RSV+
	Test details	Mean rank 1	Mean rank 2	Mean rank diff.	n1	n2	Z		Test details	Mean rank 1	Mean rank 2	Mean rank diff.	n1	n2	Z
	HC vs. IAV+	43.67	19.75	23.92	15	22	4.458		HC vs. IAV+	11.85	25.28	-13.43	13	18	2.583
	HC vs. SARS-CoV-2	43.67	25.13	18.54	15	8	2.644		HC vs. SARS-CoV-2	11.85	33	-21.15	13	8	3.295
	HC vs. IBV+	43.67	24.3	19.37	15	5	2.341		HC vs. IBV+	11.85	35	-23.15	13	5	3.079
	HC vs. RSV+	43.67	25.6	18.07	15	5	2.184		HC vs. RSV+	11.85	35.4	-23.55	13	5	3.133
	Dunn's multiple comparisons test	Mean rank diff.	Significant?	Summary	Adjusted P Value	B-?			Dunn's multiple comparisons test	Mean rank diff.	Significant?	Summary	Adjusted P Value	J-?
	IAV+ vs. HC	-23.92	Yes	****	<0.0001	A	HC		IAV+ vs. HC	13.43	Yes	*	0.0392	I	HC
	IAV+ vs. SARS-CoV-2	-5.375	No	ns	>0.9999	C	SARS-CoV-2		IAV+ vs. SARS-CoV-2	-7.722	No	ns	0.8136	K	SARS-CoV-2
	IAV+ vs. IBV+	-4.55	No	ns	>0.9999	D	IBV+		IAV+ vs. IBV+	-9.722	No	ns	0.7132	L	IBV+
	IAV+ vs. RSV+	-5.85	No	ns	>0.9999	E	RSV+		IAV+ vs. RSV+	-10.12	No	ns	0.6444	M	RSV+
	Test details	Mean rank 1	Mean rank 2	Mean rank diff.	n1	n2	Z		Test details	Mean rank 1	Mean rank 2	Mean rank diff.	n1	n2	Z
	IAV+ vs. HC	19.75	43.67	-23.92	22	15	4.458		IAV+ vs. HC	25.28	11.85	13.43	18	13	2.583
	IAV+ vs. SARS-CoV-2	19.75	25.13	-5.375	22	8	0.8126		IAV+ vs. SARS-CoV-2	25.28	33	-7.722	18	8	1.272
	IAV+ vs. IBV+	19.75	24.3	-4.55	22	5	0.5733		IAV+ vs. IBV+	25.28	35	-9.722	18	5	1.346
	IAV+ vs. RSV+	19.75	25.6	-5.85	22	5	0.737		IAV+ vs. RSV+	25.28	35.4	-10.12	18	5	1.401
