# Supplementary material for: Human influenza virus infection elicits distinct patterns of monocyte and dendritic cell mobilization in blood and the nasopharynx
Source: eLife. 2023 Feb 8;12:e77345. doi: 10.7554/eLife.77345 (PMC9977282; doi:10.7554/eLife.77345)
Supplement: Figure 6—source data 11. [file elife-77345-fig6-data11.xlsx]

## Sheet: Sheet1
Plasma	TNF							IL-6								IFN
	HC	IAV+	SARS-CoV-2	IBV+	RSV+			HC	IAV+	SARS-CoV-2	IBV+	RSV+			HC	IAV+	SARS-CoV-2	IBV+	RSV+
	24.5128	31.94	345.204	17.14	0			3.33547	88.02	37.7651	10.28	35.84			0	40.6503	6.89314	86.605	17.6462
	12.1471	17.14	152.444	17.14	26.8552			2.96852	24.62	17.4109	20.68	7.76972			0	8.69486	1	0	0
	5.9826	13.48	224.536	31.94	1883.98			10.7726	31.74	20.5495	31.94	145.398			1.73708	46.5914	5.88995	27.4262	25.1436
	7.23349	8.46	573.677	22.94	308.393			16.213	14.84	72.9169	26	2.50934			0	37.4717	7.75962	0	12.307
		20.22	152.097		20.9418			5.3874	32.34	25.2118	65.1136	2.54997			5.44965	0	1	12.9202	5.09082
		20.22	220.852		914.472			1.892	17.94	998.201	23.023	48.0412			0	42.631	3.4168	0	0
		20.22	157.615		11.3285			0.86	42.36	21.2669	122.495	11.7301			0	0	1
		0						3.892	26		0				0	0
		0							15.5		110.378				8.98078	0
		22.94							21.2		54.9326				0	0
		15.4							36.22						13.5688	28.6241
		17.14							22.2						0	0
		130.518							36.0441							184.753
		49.1791							26.5049							11.7623
		1901.51							592.97							0
		430.587							2.5237							138.183
		35.3507							408.949							0
		82.6958							8.15708							392.227
		67.5127							853.083							125.377
		131.265							43.0667
		30.3963							20.6689
		105.468							2.71685
		20.8933							255.147
		16.6981							112.998
		16.2747							91.315
		85.1334							271.45
		171.263							652.731
		26.7188							63.9378
		239.612							307.761
		134.104							70.283
		458.781							88.652
									106.893
Median	9.69032	30.3963	220.852	20.04	26.8552			3.61373	39.29	25.2118	28.97	11.7301			0	11.7623	3.4168	6.46008	8.69891
	Kruskal-Wallis test							Kruskal-Wallis test							Kruskal-Wallis test
	P value	0.008						P value	0.0016						P value	0.2346
	Exact or approximate P value?	Approximate						Exact or approximate P value?	Approximate						Exact or approximate P value?	Approximate
	P value summary	**						P value summary	**						P value summary	ns
	Do the medians vary signif. (P < 0.05)?	Yes						Do the medians vary signif. (P < 0.05)?	Yes						Do the medians vary signif. (P < 0.05)?	No
	Number of groups	5						Number of groups	5						Number of groups	5
	Kruskal-Wallis statistic	13.79						Kruskal-Wallis statistic	17.36						Kruskal-Wallis statistic	5.559
	Dunn's multiple comparisons test	Mean rank diff.	Significant?	Summary	Adjusted P Value	A-?		Dunn's multiple comparisons test	Mean rank diff.	Significant?	Summary	Adjusted P Value	H-?		Dunn's multiple comparisons test	Mean rank diff.	Significant?	Summary	Adjusted P Value	O-?
	HC vs. IAV+	-15.59	No	ns	0.2294	B	IAV+	HC vs. IAV+	-29.36	Yes	***	0.0003	I	IAV+	HC vs. IAV+	-12.05	No	ns	0.0793	P	IAV+
	HC vs. SARS-CoV-2	-33.18	Yes	**	0.0024	C	SARS-CoV-2	HC vs. SARS-CoV-2	-26.09	Yes	*	0.0271	J	SARS-CoV-2	HC vs. SARS-CoV-2	-8.845	No	ns	0.7395	Q	SARS-CoV-2
	HC vs. IBV+	-9.75	No	ns	>0.9999	D	IBV+	HC vs. IBV+	-23.53	Yes	*	0.0309	K	IBV+	HC vs. IBV+	-8.25	No	ns	0.9578	R	IBV+
	HC vs. RSV+	-19.04	No	ns	0.1966	E	RSV+	HC vs. RSV+	-15.23	No	ns	0.4558	L	RSV+	HC vs. RSV+	-9.25	No	ns	0.7488	S	RSV+
	Test details	Mean rank 1	Mean rank 2	Mean rank diff.	n1	n2	Z	Test details	Mean rank 1	Mean rank 2	Mean rank diff.	n1	n2	Z	Test details	Mean rank 1	Mean rank 2	Mean rank diff.	n1	n2	Z
	HC vs. IAV+	10.25	25.84	-15.59	4	31	1.901	HC vs. IAV+	9.625	38.98	-29.36	8	32	3.989	HC vs. IAV+	17.58	29.63	-12.05	12	19	2.329
	HC vs. SARS-CoV-2	10.25	43.43	-33.18	4	7	3.429	HC vs. SARS-CoV-2	9.625	35.71	-26.09	8	7	2.707	HC vs. SARS-CoV-2	17.58	26.43	-8.845	12	7	1.326
	HC vs. IBV+	10.25	20	-9.75	4	4	0.8932	HC vs. IBV+	9.625	33.15	-23.53	8	10	2.664	HC vs. IBV+	17.58	25.83	-8.25	12	6	1.176
	HC vs. RSV+	10.25	29.29	-19.04	4	7	1.967	HC vs. RSV+	9.625	24.86	-15.23	8	7	1.581	HC vs. RSV+	17.58	26.83	-9.25	12	6	1.319
	Dunn's multiple comparisons test	Mean rank diff.	Significant?	Summary	Adjusted P Value	B-?		Dunn's multiple comparisons test	Mean rank diff.	Significant?	Summary	Adjusted P Value	I-?		Dunn's multiple comparisons test	Mean rank diff.	Significant?	Summary	Adjusted P Value	P-?
	IAV+ vs. HC	15.59	No	ns	0.2294	A	HC	IAV+ vs. HC	29.36	Yes	***	0.0003	H	HC	IAV+ vs. HC	12.05	No	ns	0.0793	O	HC
	IAV+ vs. SARS-CoV-2	-17.59	Yes	*	0.0259	C	SARS-CoV-2	IAV+ vs. SARS-CoV-2	3.27	No	ns	>0.9999	J	SARS-CoV-2	IAV+ vs. SARS-CoV-2	3.203	No	ns	>0.9999	Q	SARS-CoV-2
	IAV+ vs. IBV+	5.839	No	ns	>0.9999	D	IBV+	IAV+ vs. IBV+	5.834	No	ns	>0.9999	K	IBV+	IAV+ vs. IBV+	3.798	No	ns	>0.9999	R	IBV+
	IAV+ vs. RSV+	-3.447	No	ns	>0.9999	E	RSV+	IAV+ vs. RSV+	14.13	No	ns	0.276	L	RSV+	IAV+ vs. RSV+	2.798	No	ns	>0.9999	S	RSV+
	Test details	Mean rank 1	Mean rank 2	Mean rank diff.	n1	n2	Z	Test details	Mean rank 1	Mean rank 2	Mean rank diff.	n1	n2	Z	Test details	Mean rank 1	Mean rank 2	Mean rank diff.	n1	n2	Z
	IAV+ vs. HC	25.84	10.25	15.59	31	4	1.901	IAV+ vs. HC	38.98	9.625	29.36	32	8	3.989	IAV+ vs. HC	29.63	17.58	12.05	19	12	2.329
	IAV+ vs. SARS-CoV-2	25.84	43.43	-17.59	31	7	2.723	IAV+ vs. SARS-CoV-2	38.98	35.71	3.27	32	7	0.4209	IAV+ vs. SARS-CoV-2	29.63	26.43	3.203	19	7	0.5165
	IAV+ vs. IBV+	25.84	20	5.839	31	4	0.7119	IAV+ vs. IBV+	38.98	33.15	5.834	32	10	0.865	IAV+ vs. IBV+	29.63	25.83	3.798	19	6	0.5782
	IAV+ vs. RSV+	25.84	29.29	-3.447	31	7	0.5336	IAV+ vs. RSV+	38.98	24.86	14.13	32	7	1.818	IAV+ vs. RSV+	29.63	26.83	2.798	19	6	0.426
