# Supplementary material for: Human influenza virus infection elicits distinct patterns of monocyte and dendritic cell mobilization in blood and the nasopharynx
Source: eLife. 2023 Feb 8;12:e77345. doi: 10.7554/eLife.77345 (PMC9977282; doi:10.7554/eLife.77345)
Supplement: Figure 6—source data 12. [file elife-77345-fig6-data12.xlsx]

## Sheet: Sheet1
NPA	TNF							IL-6								IFN
	HC	IAV+	SARS-CoV-2	IBV+	RSV+			HC	IAV+	SARS-CoV-2	IBV+	RSV+			HC	IAV+	SARS-CoV-2	IBV+	RSV+
	18.8254	1241.2	42.8588	22.5788	181.359			1.31995	640.499	19.997	12.4976	281.759			2.7142	33.1039	5.75813	96.29	152.113
	12.1555	1198.94	20.0462	15.1344	80.6027			1.18879	2.67113	26.9851	56.499	1.542			0	31.3682	1	77.6344	74.272
	17.1527	54.3832	26.8487	37.3118	1233.44			1.9593	166.274	5.05916	74.9684	2.62426			4.54847	90.7042	18.0624	16.9811	9.38335
	12.4222	13.1255	62.8292	94.9846	52.5329			3.32636	1.8623	26.1831	36.1301	1.13632			2.82958	4.19091	1	74.5501	4.50888
		24.6875	40.4166		17.1557			0.2	11.1568	37.1355	56.87	9.6566			2.66702	2.38201	1	3.43346	5.235
		30.2504	28.121		4.80712			1.3	110.434	3.73645	414.43	461.119			0	3.6593	6.00095		8.47301
		56.4652	38.4178					2.38	124.199	2.91077					2.4649	75.5147	5.38492
		1256.4						1.39	87.2892						0	78.6917
		55.1333							23.8373						2.60969	0.506981
		6.81515							35.0934						4.17585	3.28124
		29.1021							16.4403						0	28.6091
		5.13917							24.6288						0	8.92652
		40.4865							300.283							0
		8.49138							608.72							8.07426
		65.9943							4.38							0
		18.3067							591.31							14.6118
		17.664							79.31							47.7243
		42.663
Median	14.7874	35.3684	38.4178	29.9453	66.5678			1.35497	79.31	19.997	56.6845	6.14043			2.5373	8.92652	5.38492	74.5501	8.92818
	Kruskal-Wallis test							Kruskal-Wallis test							Kruskal-Wallis test
	P value	0.271						P value	0.0007						P value	0.0014
	Exact or approximate P value?	Approximate						Exact or approximate P value?	Approximate						Exact or approximate P value?	Approximate
	P value summary	ns						P value summary	***						P value summary	**
	Do the medians vary signif. (P < 0.05)?	No						Do the medians vary signif. (P < 0.05)?	Yes						Do the medians vary signif. (P < 0.05)?	Yes
	Number of groups	5						Number of groups	5						Number of groups	5
	Kruskal-Wallis statistic	5.163						Kruskal-Wallis statistic	19.33						Kruskal-Wallis statistic	17.76
	Dunn's multiple comparisons test	Mean rank diff.	Significant?	Summary	Adjusted P Value	A-?		Dunn's multiple comparisons test	Mean rank diff.	Significant?	Summary	Adjusted P Value	H-?		Dunn's multiple comparisons test	Mean rank diff.	Significant?	Summary	Adjusted P Value	O-?
	HC vs. IAV+	-12.58	No	ns	0.1835	B	IAV+	HC vs. IAV+	-22.5	Yes	***	0.0002	I	IAV+	HC vs. IAV+	-15.51	Yes	*	0.0106	P	IAV+
	HC vs. SARS-CoV-2	-13.32	No	ns	0.2492	C	SARS-CoV-2	HC vs. SARS-CoV-2	-14.5	No	ns	0.1167	J	SARS-CoV-2	HC vs. SARS-CoV-2	-9.19	No	ns	0.632	Q	SARS-CoV-2
	HC vs. IBV+	-11.25	No	ns	0.6516	D	IBV+	HC vs. IBV+	-23.67	Yes	**	0.0026	K	IBV+	HC vs. IBV+	-24.93	Yes	**	0.0025	R	IBV+
	HC vs. RSV+	-15.58	No	ns	0.1369	E	RSV+	HC vs. RSV+	-13	No	ns	0.2437	L	RSV+	HC vs. RSV+	-21.17	Yes	**	0.0079	S	RSV+
	Test details	Mean rank 1	Mean rank 2	Mean rank diff.	n1	n2	Z	Test details	Mean rank 1	Mean rank 2	Mean rank diff.	n1	n2	Z	Test details	Mean rank 1	Mean rank 2	Mean rank diff.	n1	n2	Z
	HC vs. IAV+	8.25	20.83	-12.58	4	18	1.997	HC vs. IAV+	6.5	29	-22.5	8	17	4.085	HC vs. IAV+	11.67	27.18	-15.51	12	17	3.005
	HC vs. SARS-CoV-2	8.25	21.57	-13.32	4	7	1.864	HC vs. SARS-CoV-2	6.5	21	-14.5	8	7	2.181	HC vs. SARS-CoV-2	11.67	20.86	-9.19	12	7	1.412
	HC vs. IBV+	8.25	19.5	-11.25	4	4	1.395	HC vs. IBV+	6.5	30.17	-23.67	8	6	3.412	HC vs. IBV+	11.67	36.6	-24.93	12	5	3.422
	HC vs. RSV+	8.25	23.83	-15.58	4	6	2.117	HC vs. RSV+	6.5	19.5	-13	8	6	1.874	HC vs. RSV+	11.67	32.83	-21.17	12	6	3.093
	Dunn's multiple comparisons test	Mean rank diff.	Significant?	Summary	Adjusted P Value	B-?		Dunn's multiple comparisons test	Mean rank diff.	Significant?	Summary	Adjusted P Value	I-?		Dunn's multiple comparisons test	Mean rank diff.	Significant?	Summary	Adjusted P Value	P-?
	IAV+ vs. HC	12.58	No	ns	0.1835	A	HC	IAV+ vs. HC	22.5	Yes	***	0.0002	H	HC	IAV+ vs. HC	15.51	Yes	*	0.0106	O	HC
	IAV+ vs. SARS-CoV-2	-0.7381	No	ns	>0.9999	C	SARS-CoV-2	IAV+ vs. SARS-CoV-2	8	No	ns	0.662	J	SARS-CoV-2	IAV+ vs. SARS-CoV-2	6.319	No	ns	>0.9999	Q	SARS-CoV-2
	IAV+ vs. IBV+	1.333	No	ns	>0.9999	D	IBV+	IAV+ vs. IBV+	-1.167	No	ns	>0.9999	K	IBV+	IAV+ vs. IBV+	-9.424	No	ns	0.7039	R	IBV+
	IAV+ vs. RSV+	-3	No	ns	>0.9999	E	RSV+	IAV+ vs. RSV+	9.5	No	ns	0.4774	L	RSV+	IAV+ vs. RSV+	-5.657	No	ns	>0.9999	S	RSV+
	Test details	Mean rank 1	Mean rank 2	Mean rank diff.	n1	n2	Z	Test details	Mean rank 1	Mean rank 2	Mean rank diff.	n1	n2	Z	Test details	Mean rank 1	Mean rank 2	Mean rank diff.	n1	n2	Z
	IAV+ vs. HC	20.83	8.25	12.58	18	4	1.997	IAV+ vs. HC	29	6.5	22.5	17	8	4.085	IAV+ vs. HC	27.18	11.67	15.51	17	12	3.005
	IAV+ vs. SARS-CoV-2	20.83	21.57	-0.7381	18	7	0.1453	IAV+ vs. SARS-CoV-2	29	21	8	17	7	1.387	IAV+ vs. SARS-CoV-2	27.18	20.86	6.319	17	7	1.028
	IAV+ vs. IBV+	20.83	19.5	1.333	18	4	0.2116	IAV+ vs. IBV+	29	30.17	-1.167	17	6	0.1913	IAV+ vs. IBV+	27.18	36.6	-9.424	17	5	1.353
	IAV+ vs. RSV+	20.83	23.83	-3	18	6	0.5582	IAV+ vs. RSV+	29	19.5	9.5	17	6	1.557	IAV+ vs. RSV+	27.18	32.83	-5.657	17	6	0.8703
