# Supplementary material for: Human influenza virus infection elicits distinct patterns of monocyte and dendritic cell mobilization in blood and the nasopharynx
Source: eLife. 2023 Feb 8;12:e77345. doi: 10.7554/eLife.77345 (PMC9977282; doi:10.7554/eLife.77345)
Supplement: Supplementary file 1. [file elife-77345-supp1.xlsx]

## Sheet: Sheet1
	Supplementary Table - Flow cytometry panels
	Panel 1: Phenotyping of MNPs from PBMCs
	Fluorochrome	Marker	Company	Clone
	FITC	CD83	Biolegend	HB15e
	PerCp Cy5.5	CD123	BD	7G3
	PE Cy7	CD1c	Miltenyi	AD5-8E7
	PE Cy5	CD11c	BD	B-Ly6
	PE TR	HLA-DR	Life Technologies	TU36
	PE	CD141	Miltenyi	AD5-14H12
	APC-Cy7	CD3	BD	SK7
		CD19	BioLegend	HIB19
		CD20	BD	L27
		CD56	BD	HCD56
		CD66abce	Miltenyi	TET2
	AF700	CD16	BioLegend	3GE
	APC	CD45	BD	HI30
	BV786	CD62L	BD	SK11
	BV650	CD86	BD	2331
	BV605	CCR2	BioLegend	K036C2
	BV510	CD14	BD	M5E2
	V450	CCR7	BD	150503
	DAPI	Live/Dead Blue	Thermo Fisher	Cat no: L34962
	Panel 2: Phenotyping of PBMCs following TLR stimulation- TNF-release assay
	Fluorochrome	Marker	Company	Clone
	FITC	CD83	Biolegend	HB15e
	PerCp Cy5.5	CD123	BD	7G3
	PE Cy7	CD1c	Miltenyi	AD5-8E7
	PE Cy5	CD11c	BD	B-Ly6
	PE TR	HLA-DR	Life Technologies	TU36
	PE	TNF-α Detection Antibody	Miltenyi	(Reagent from 130-091-268)
	APC-Cy7	CD3	BD	SK7
		CD19	BioLegend	HIB19
		CD20	BD	L27
		CD56	BD	HCD56
		CD66abce	Miltenyi	TET2
	AF700	CD16	BioLegend	3GE
	APC	CD141	Miltenyi	AD5-14H12
	BV786	CD62L	BD	SK11
	BV650	CD86	BD	2331
	BV605	CCR2	BioLegend	K036C2
	BV510	CD14	BD	M5E2
	V450	CCR7	BD	150503
	DAPI	Live/Dead Blue	Thermo Fisher	Cat no: L34962
